# Supplementary material
Source: PubMed Central journal article supplement (PMC2268141)
Supplement: supp_0712176105_12176Fig8.pdf [file supp_0712176105_12176Fig8.pdf]

High pY419 Src

Low pY419 Src

High pY419 Src

Low pY419 Src

C10

C32

Caco-2

CC07

COLO 320DM

COLO-678

C70

C75

C80

CCK-81

GP2d

HCA-7

DLD-1

HDC-135

LS123

LS 180

NCI-H548

SW620

HCA-46

HCT 116

HDC-111

HDC-143

LoVo

RCM-1

220

97

66

45

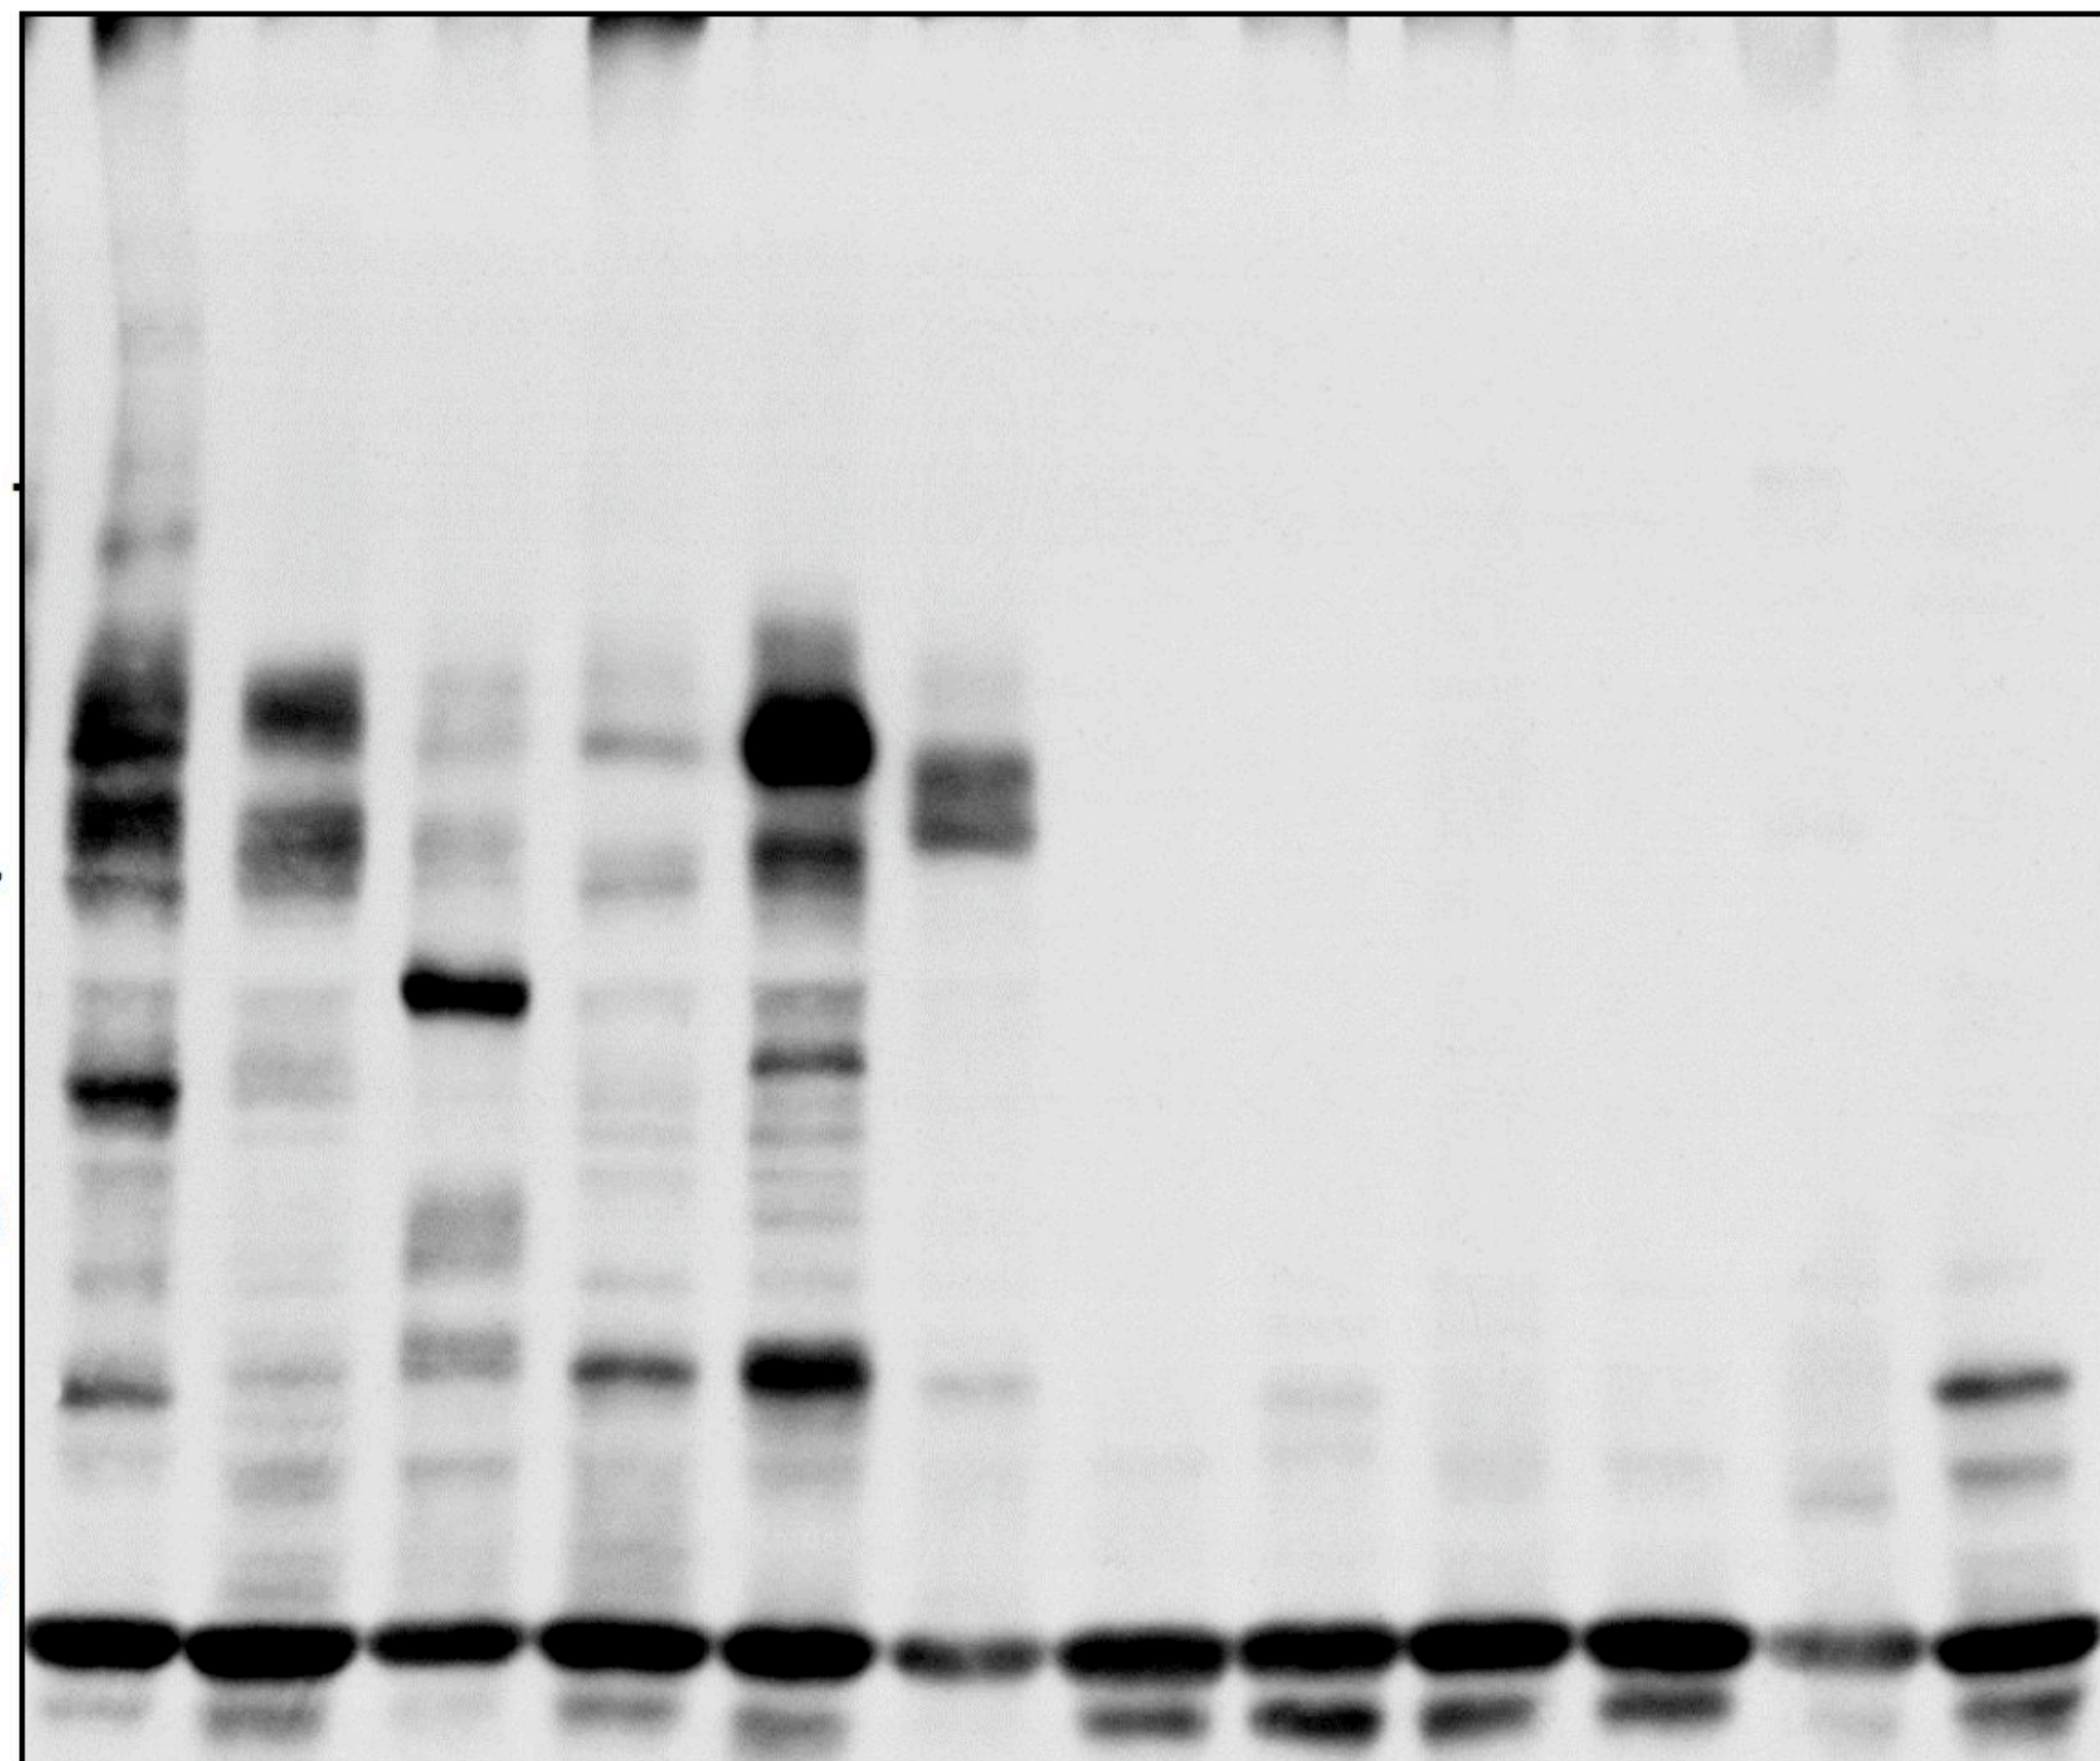

IB: pTyr (P-Tyr-100)

220

97

66

45

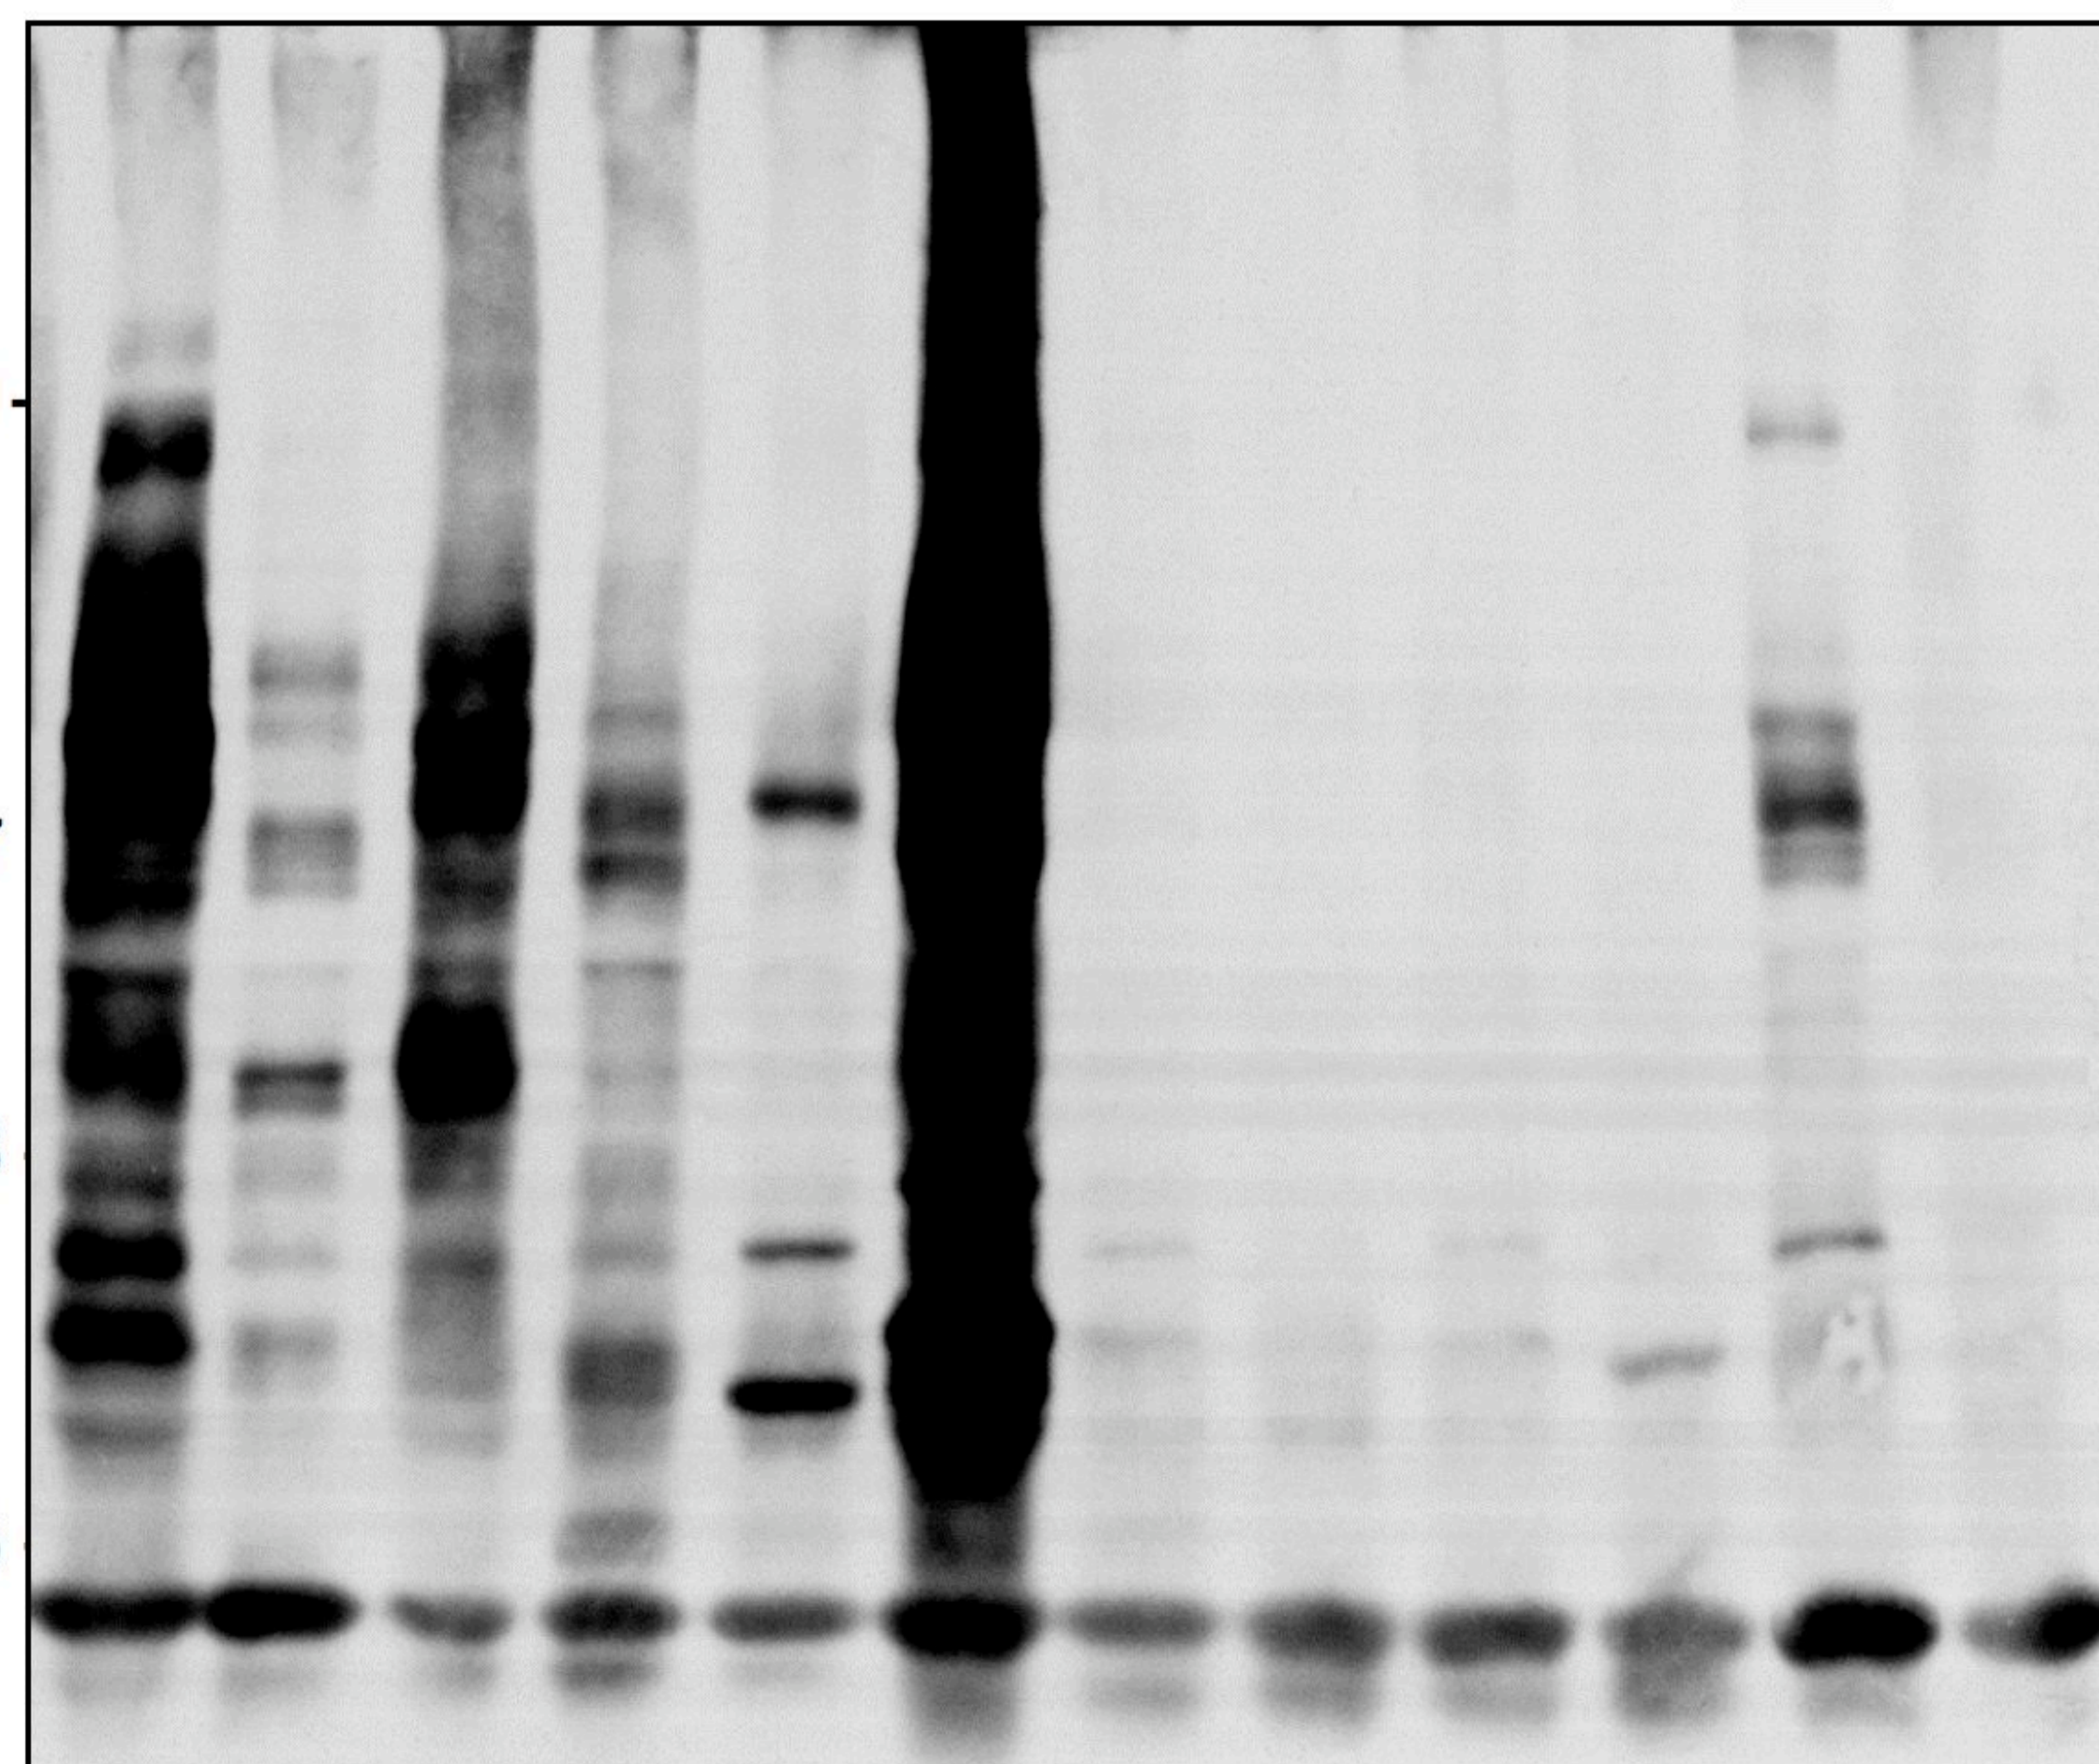

IB: pTyr (P-Tyr-100)
