# Supplementary material
Source: PubMed Central journal article supplement (PMC2268141)

COLO

C10      C32 Caco-2 320DM DLD-1 SW620  
D M    D M    D M    D M    D M    D M

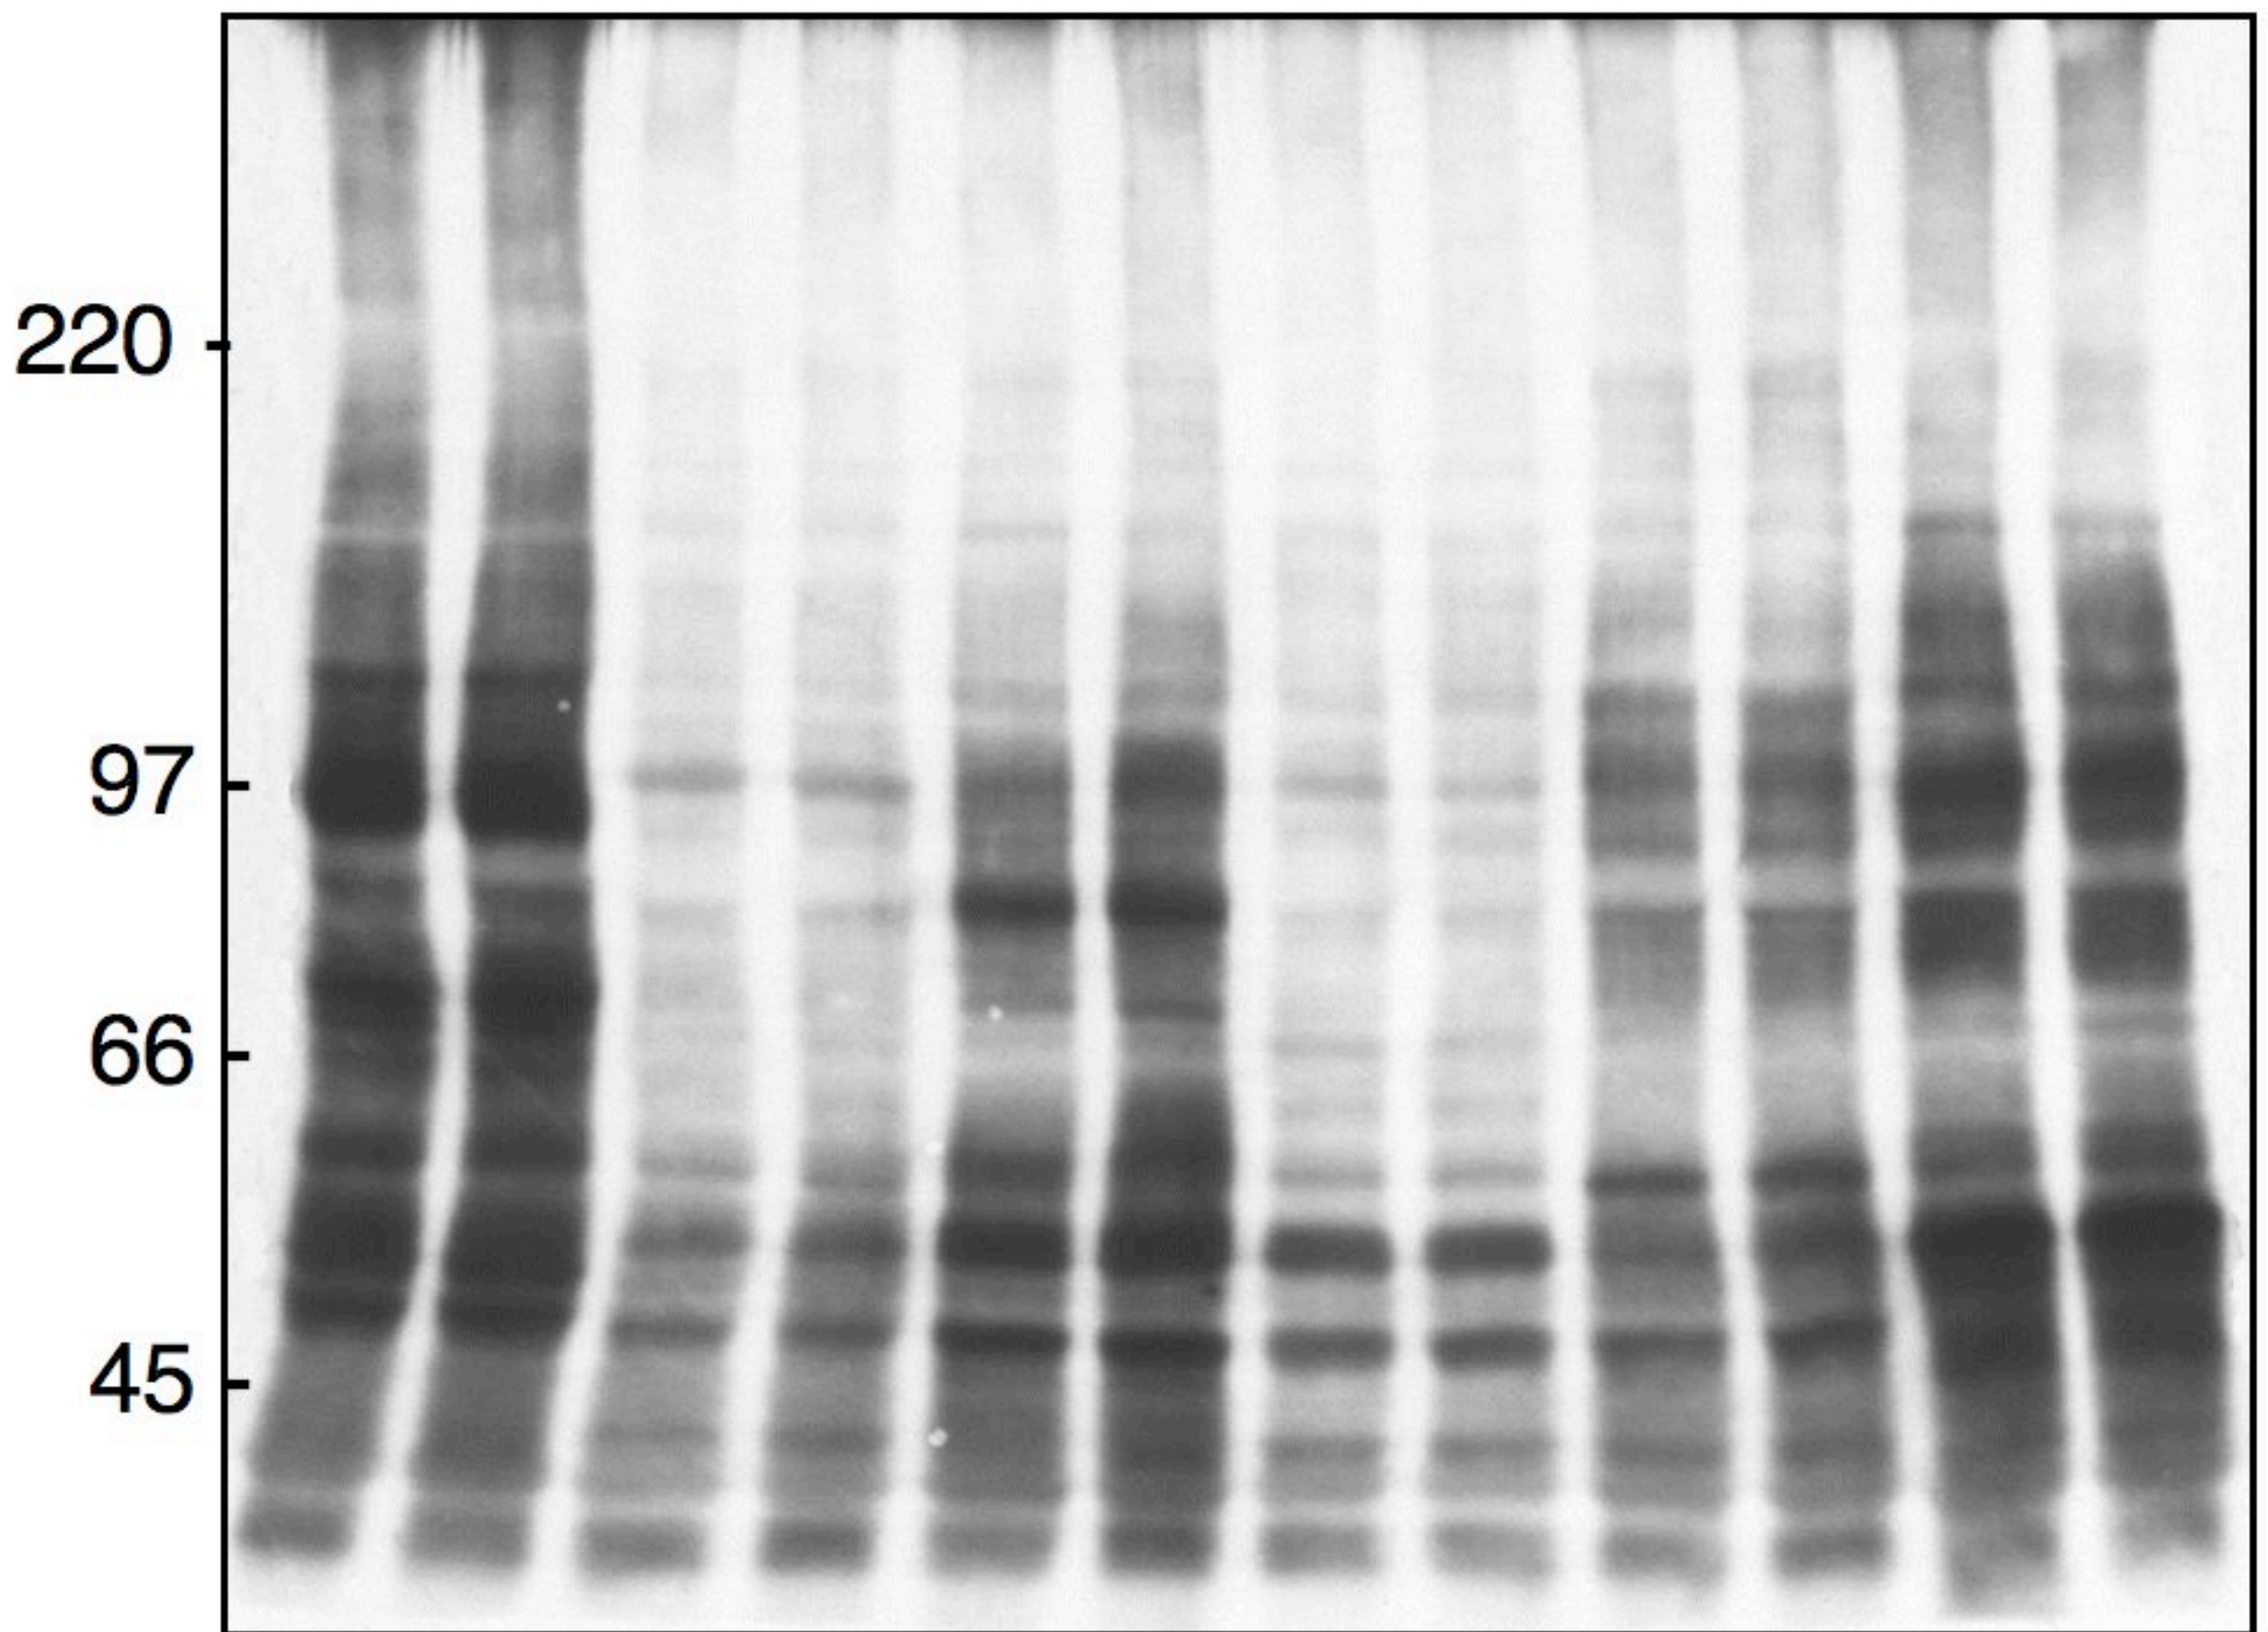

IB: pTyr (P-Tyr-100)

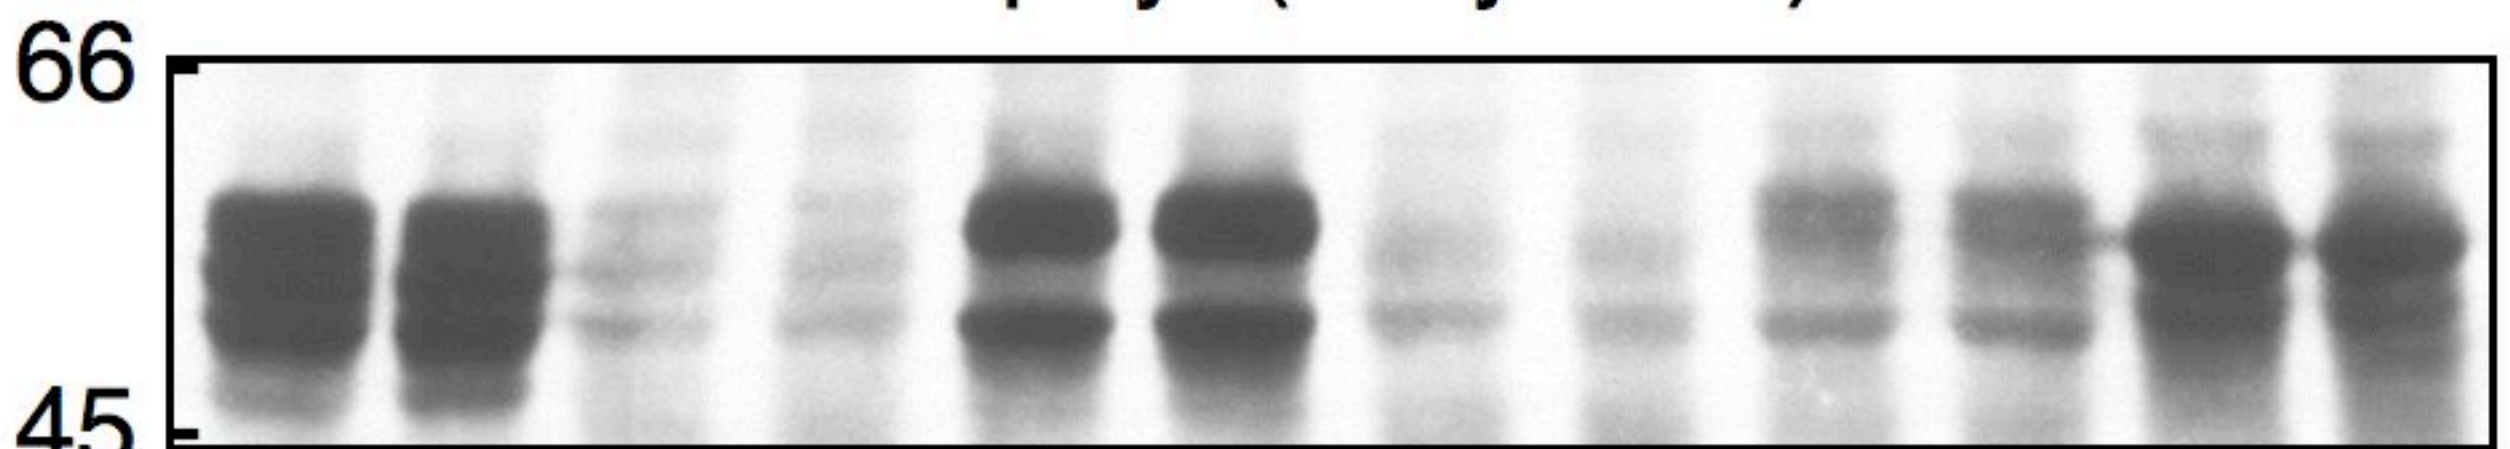

IB: pY419Src

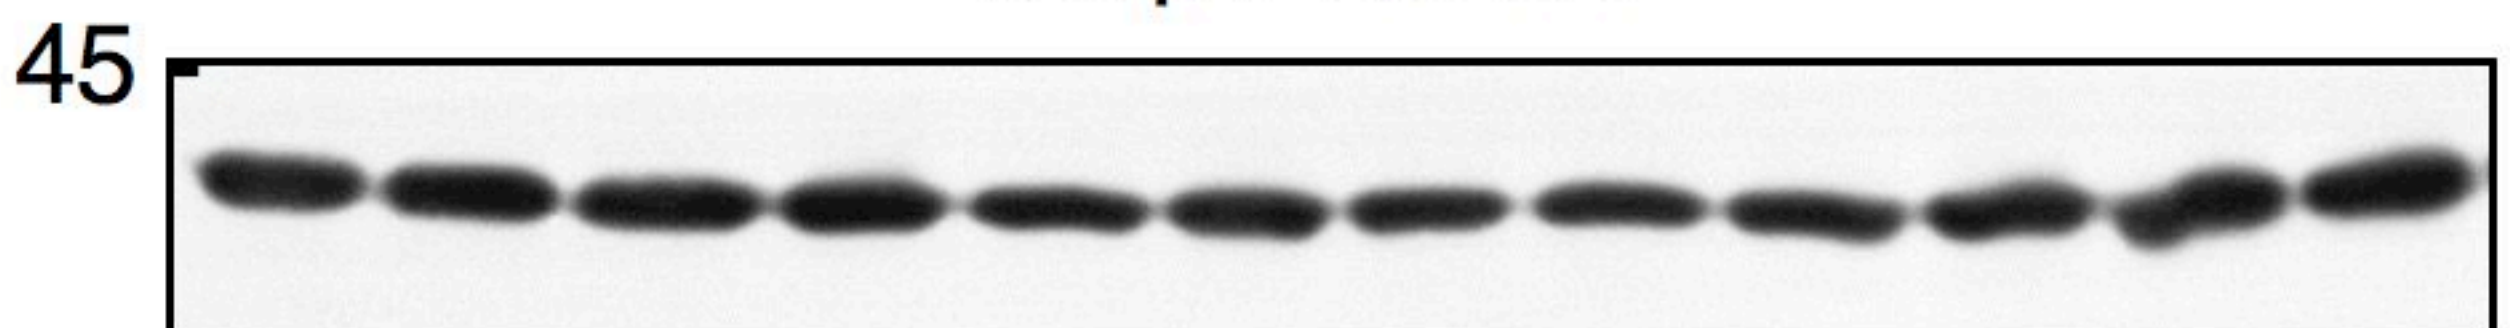

IB: actin

Supplement: supp_0712176105_12176Fig11.pdf [file supp_0712176105_12176Fig11.pdf]

**High pY419 Src**

**Low pY419 Src**

C10

C32

Caco-2

CCO7

COLO 320DM

COLO-678

DLD-1

HDC-135

LS123

LS 180

NCI-H548

SW620

HCT 116

LoVo

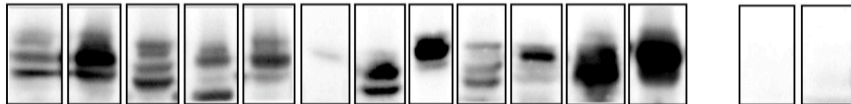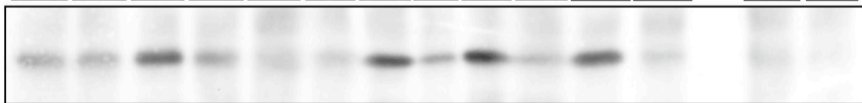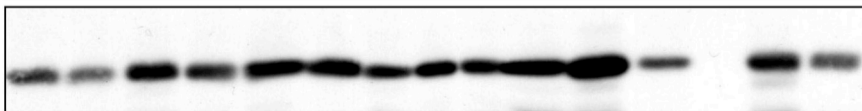

Supplement: supp_0712176105_12176Fig12.pdf [file supp_0712176105_12176Fig12.pdf]

A

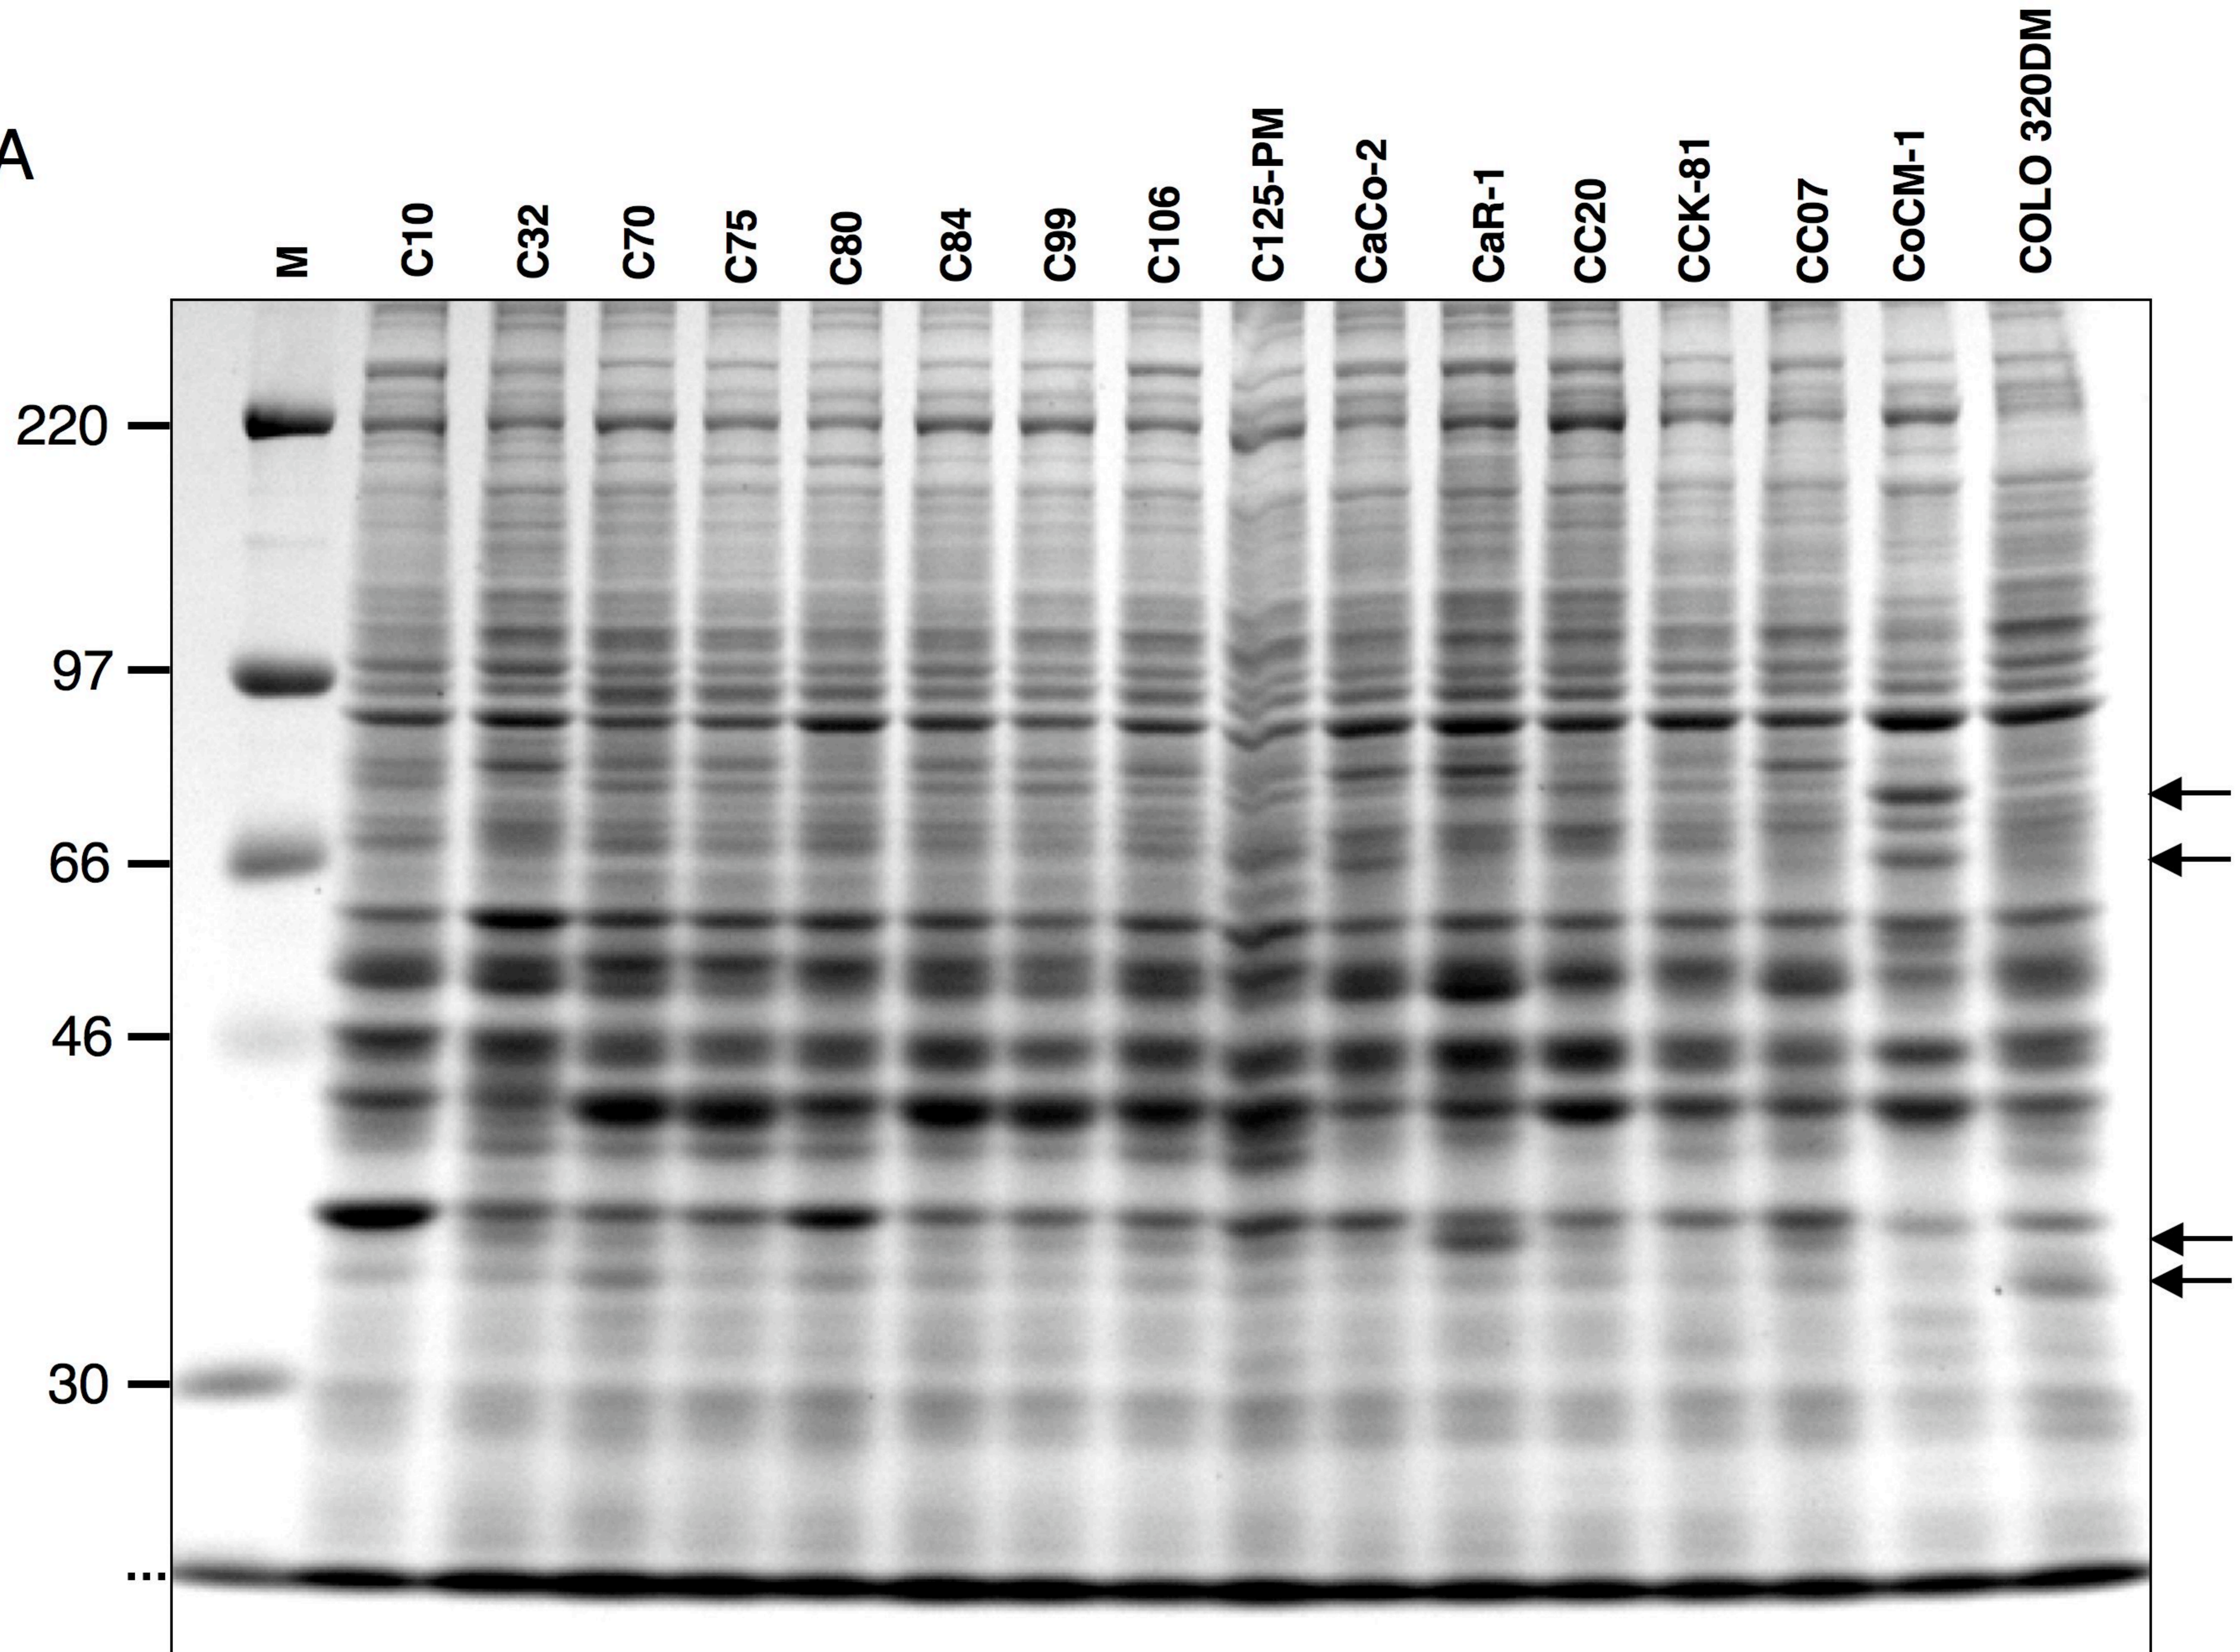

CRC cell lines 1-16

Supplement: supp_0712176105_12176Fig6A.pdf [file supp_0712176105_12176Fig6A.pdf]

C

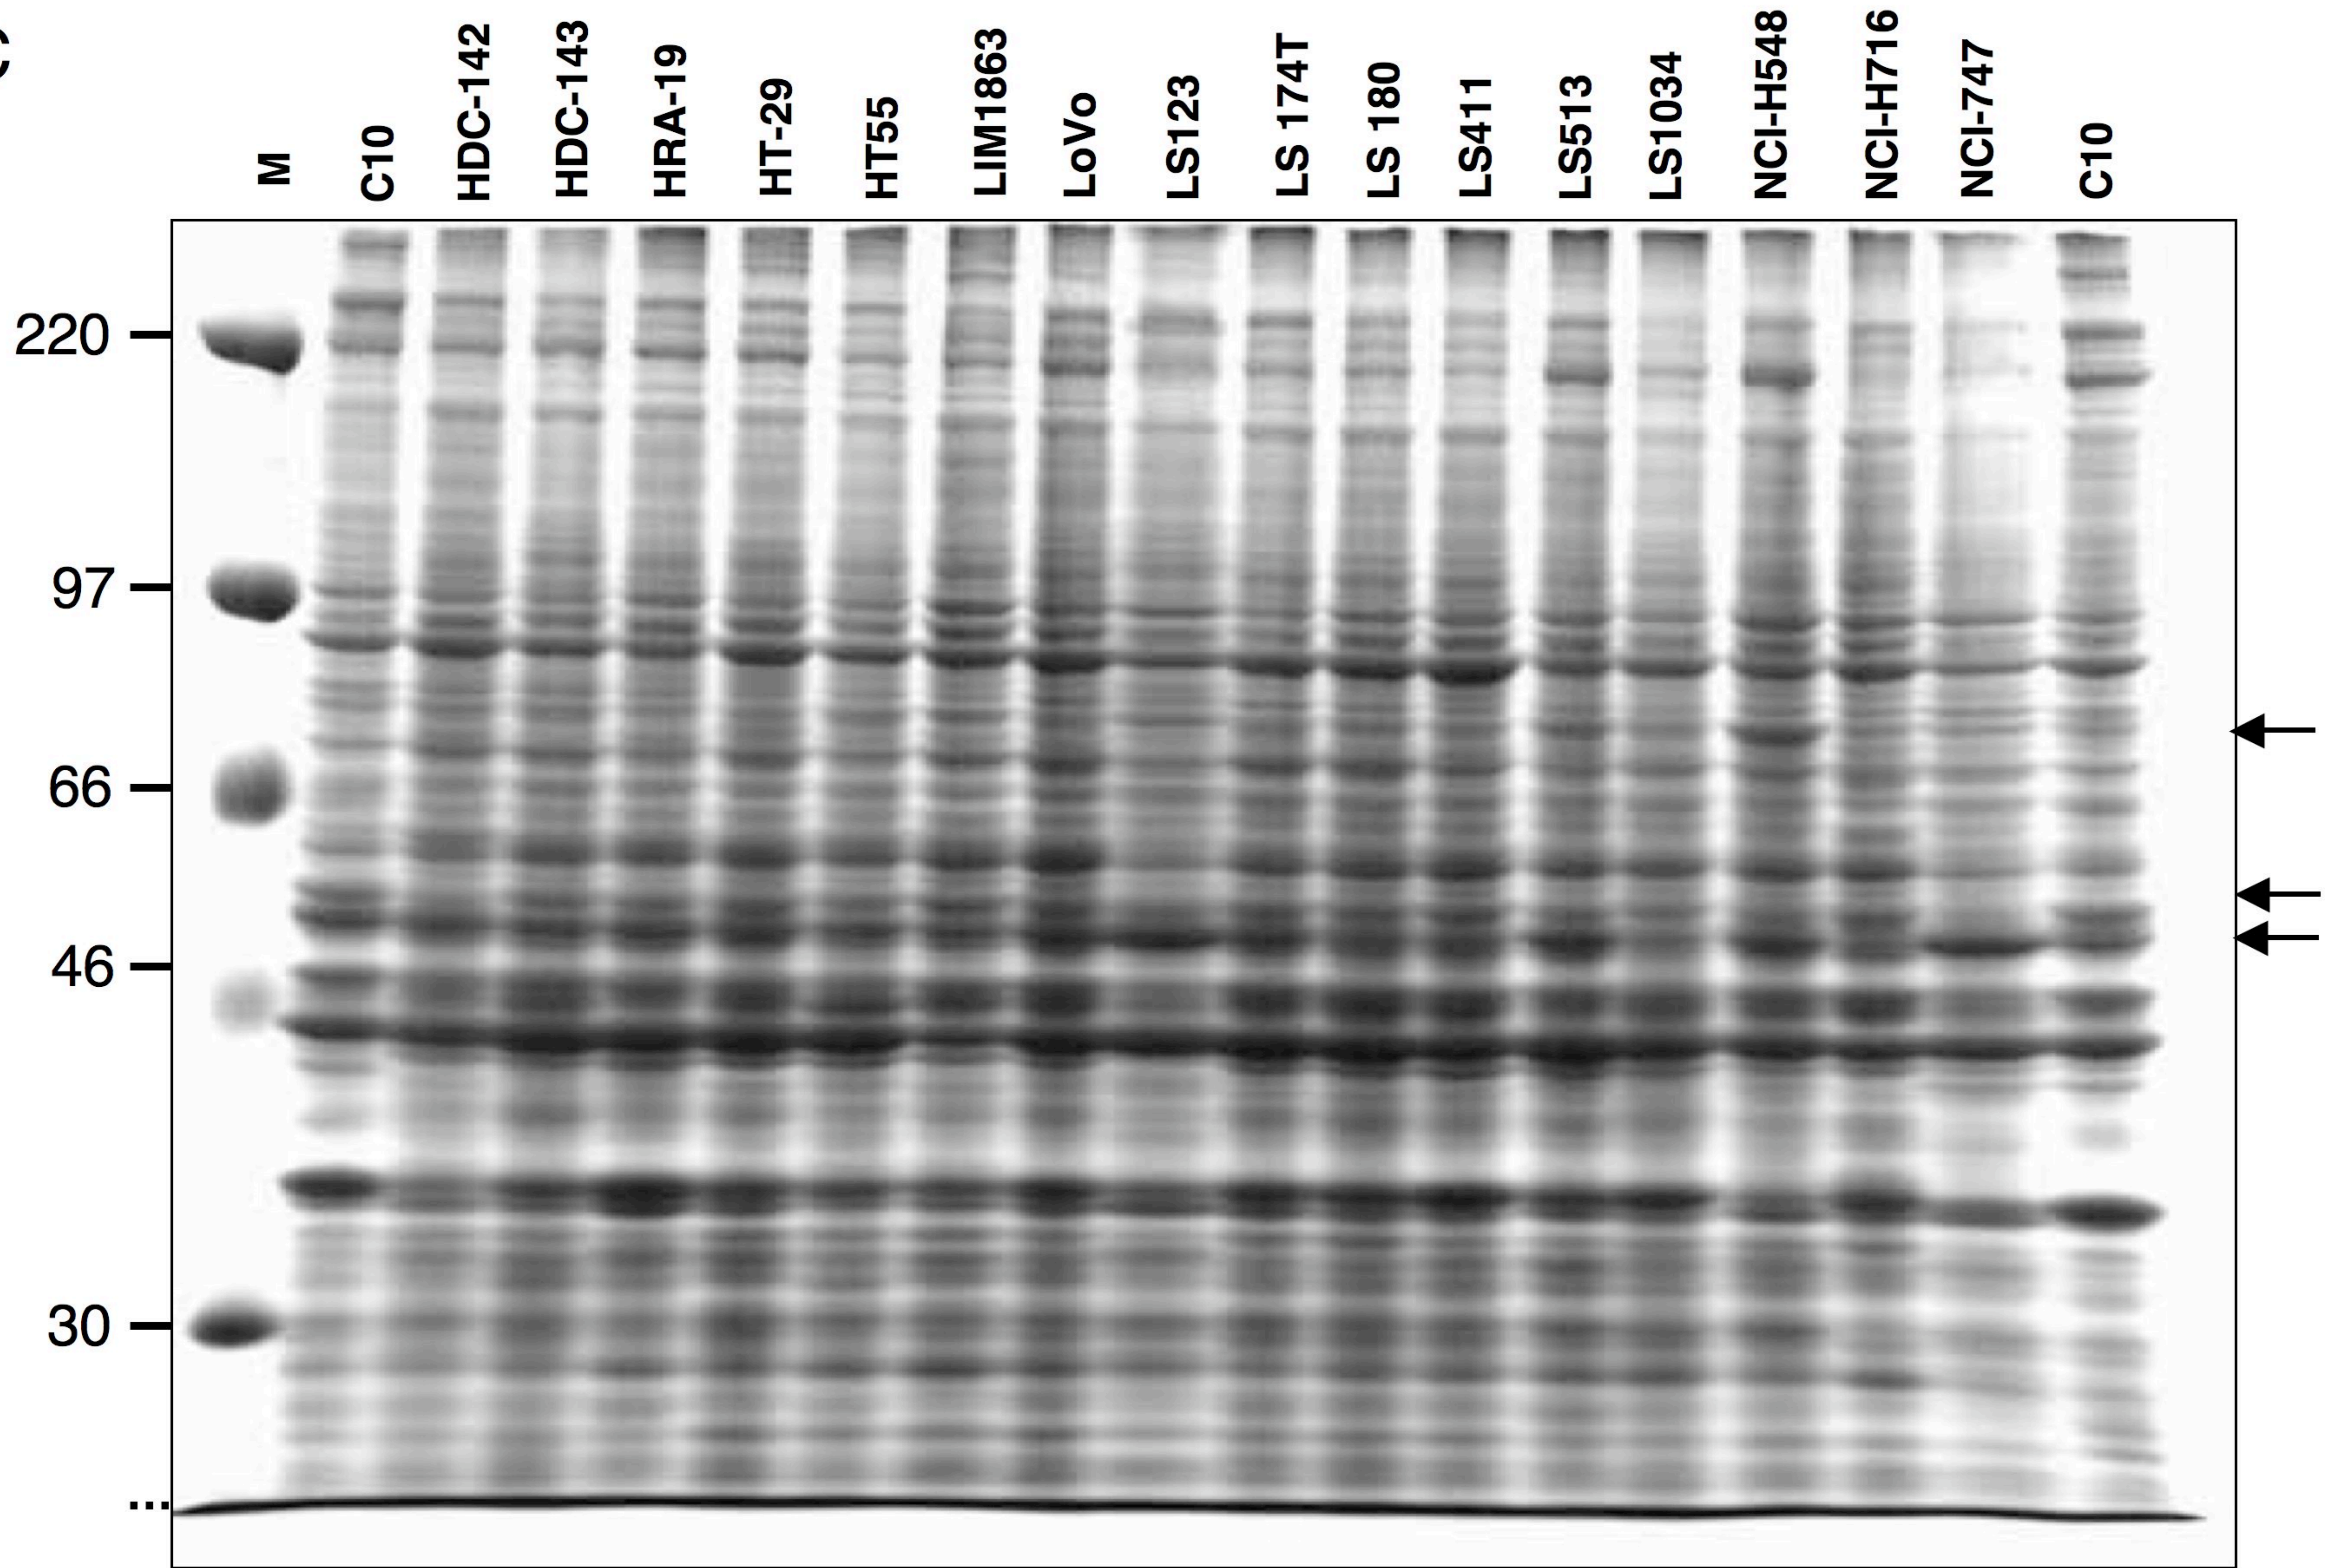

C10 & CRC cell lines 33-48

Supplement: supp_0712176105_12176Fig6C.pdf [file supp_0712176105_12176Fig6C.pdf]

III

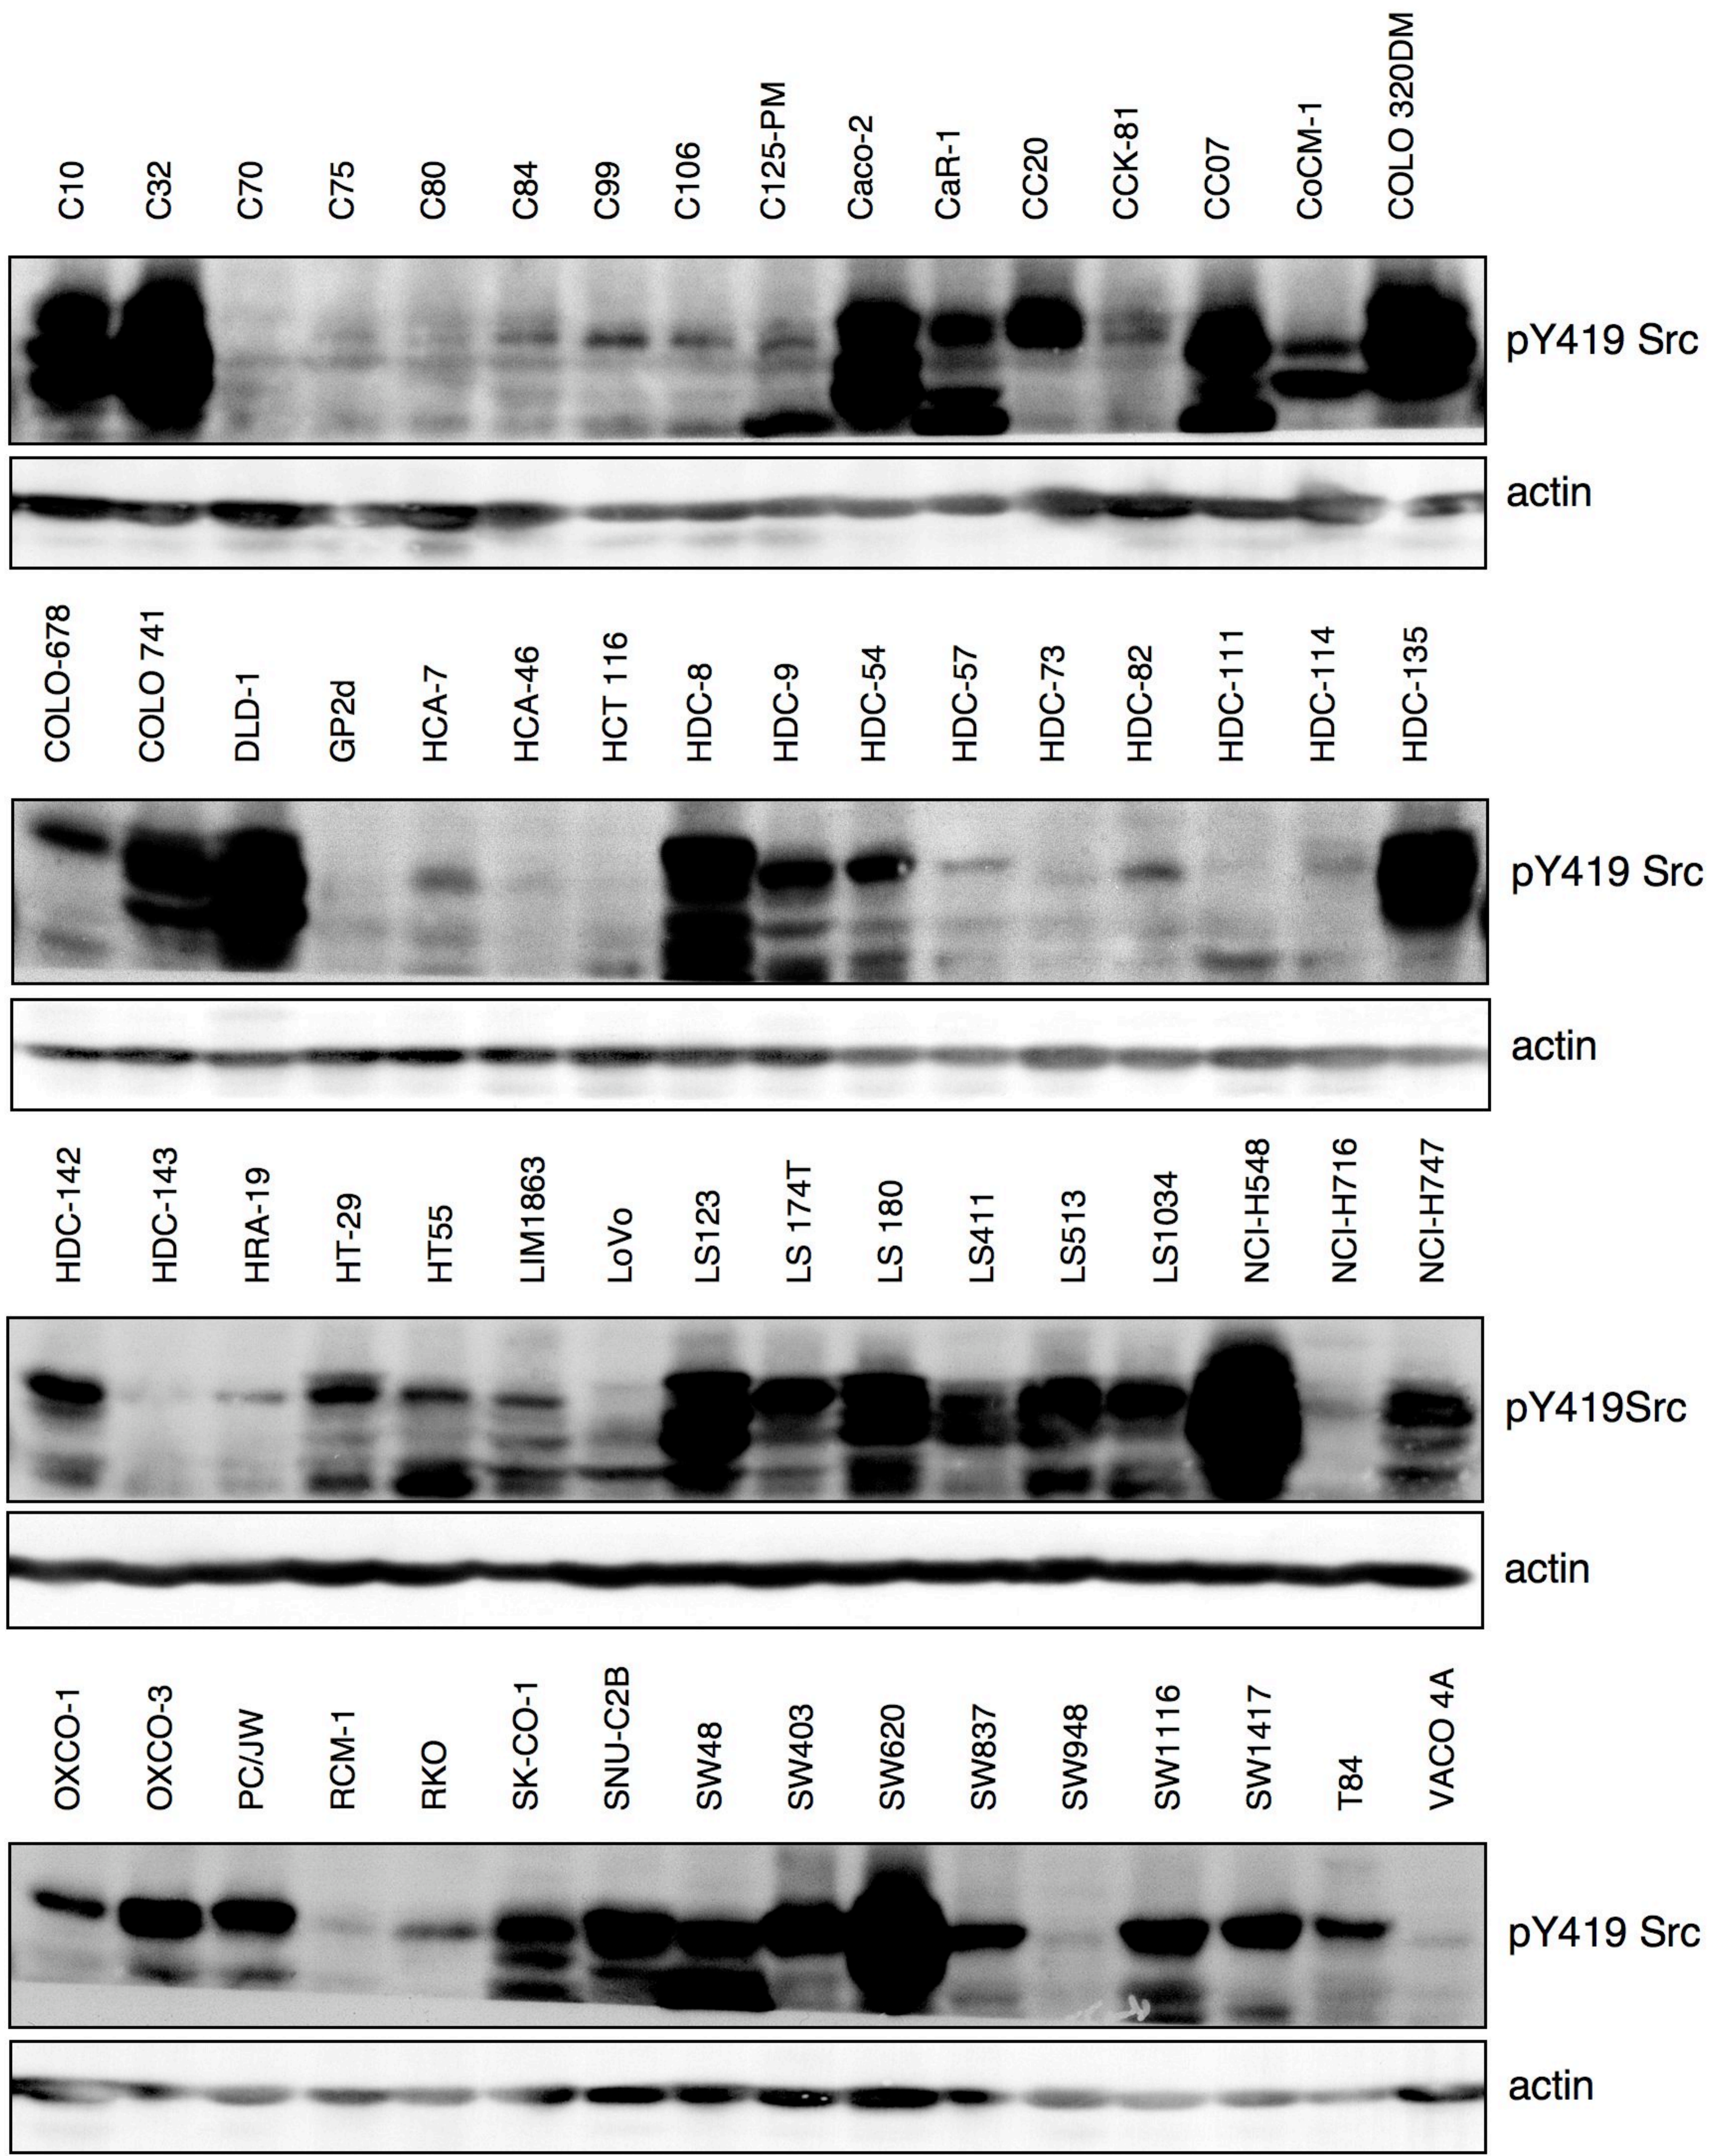

Supplement: supp_0712176105_12176Fig6E.pdf [file supp_0712176105_12176Fig6E.pdf]

# High pY419 Src

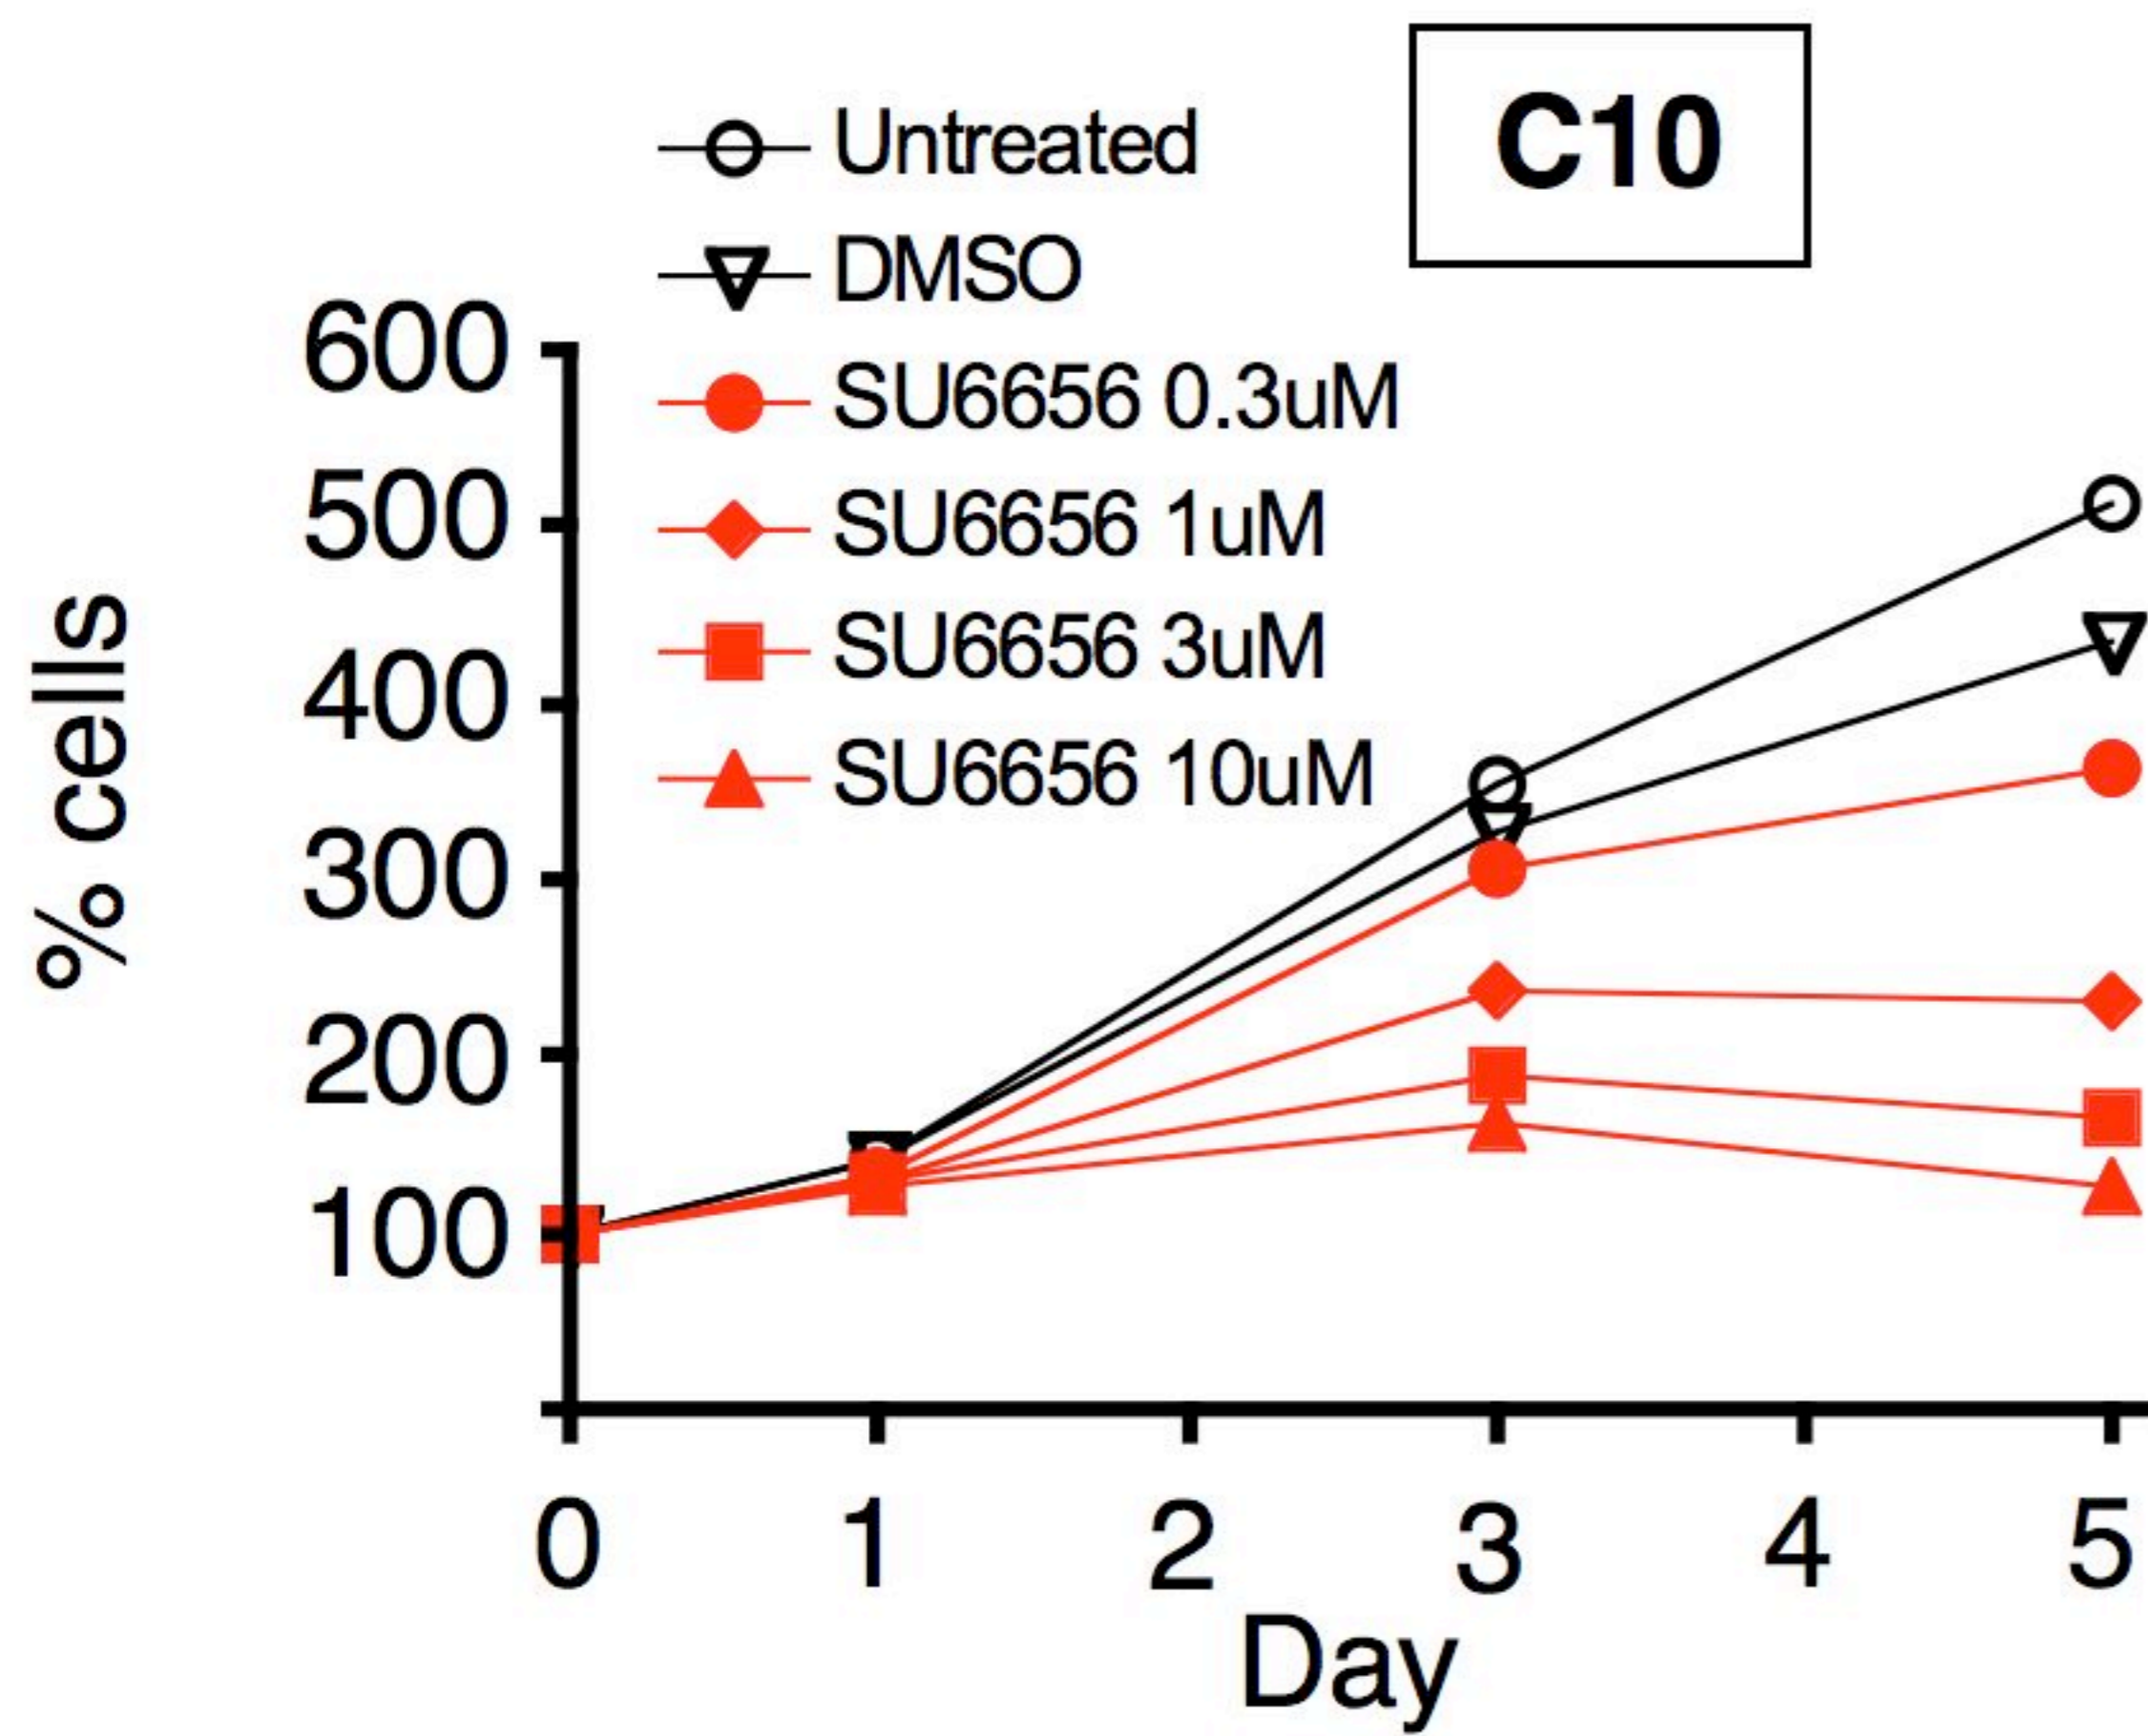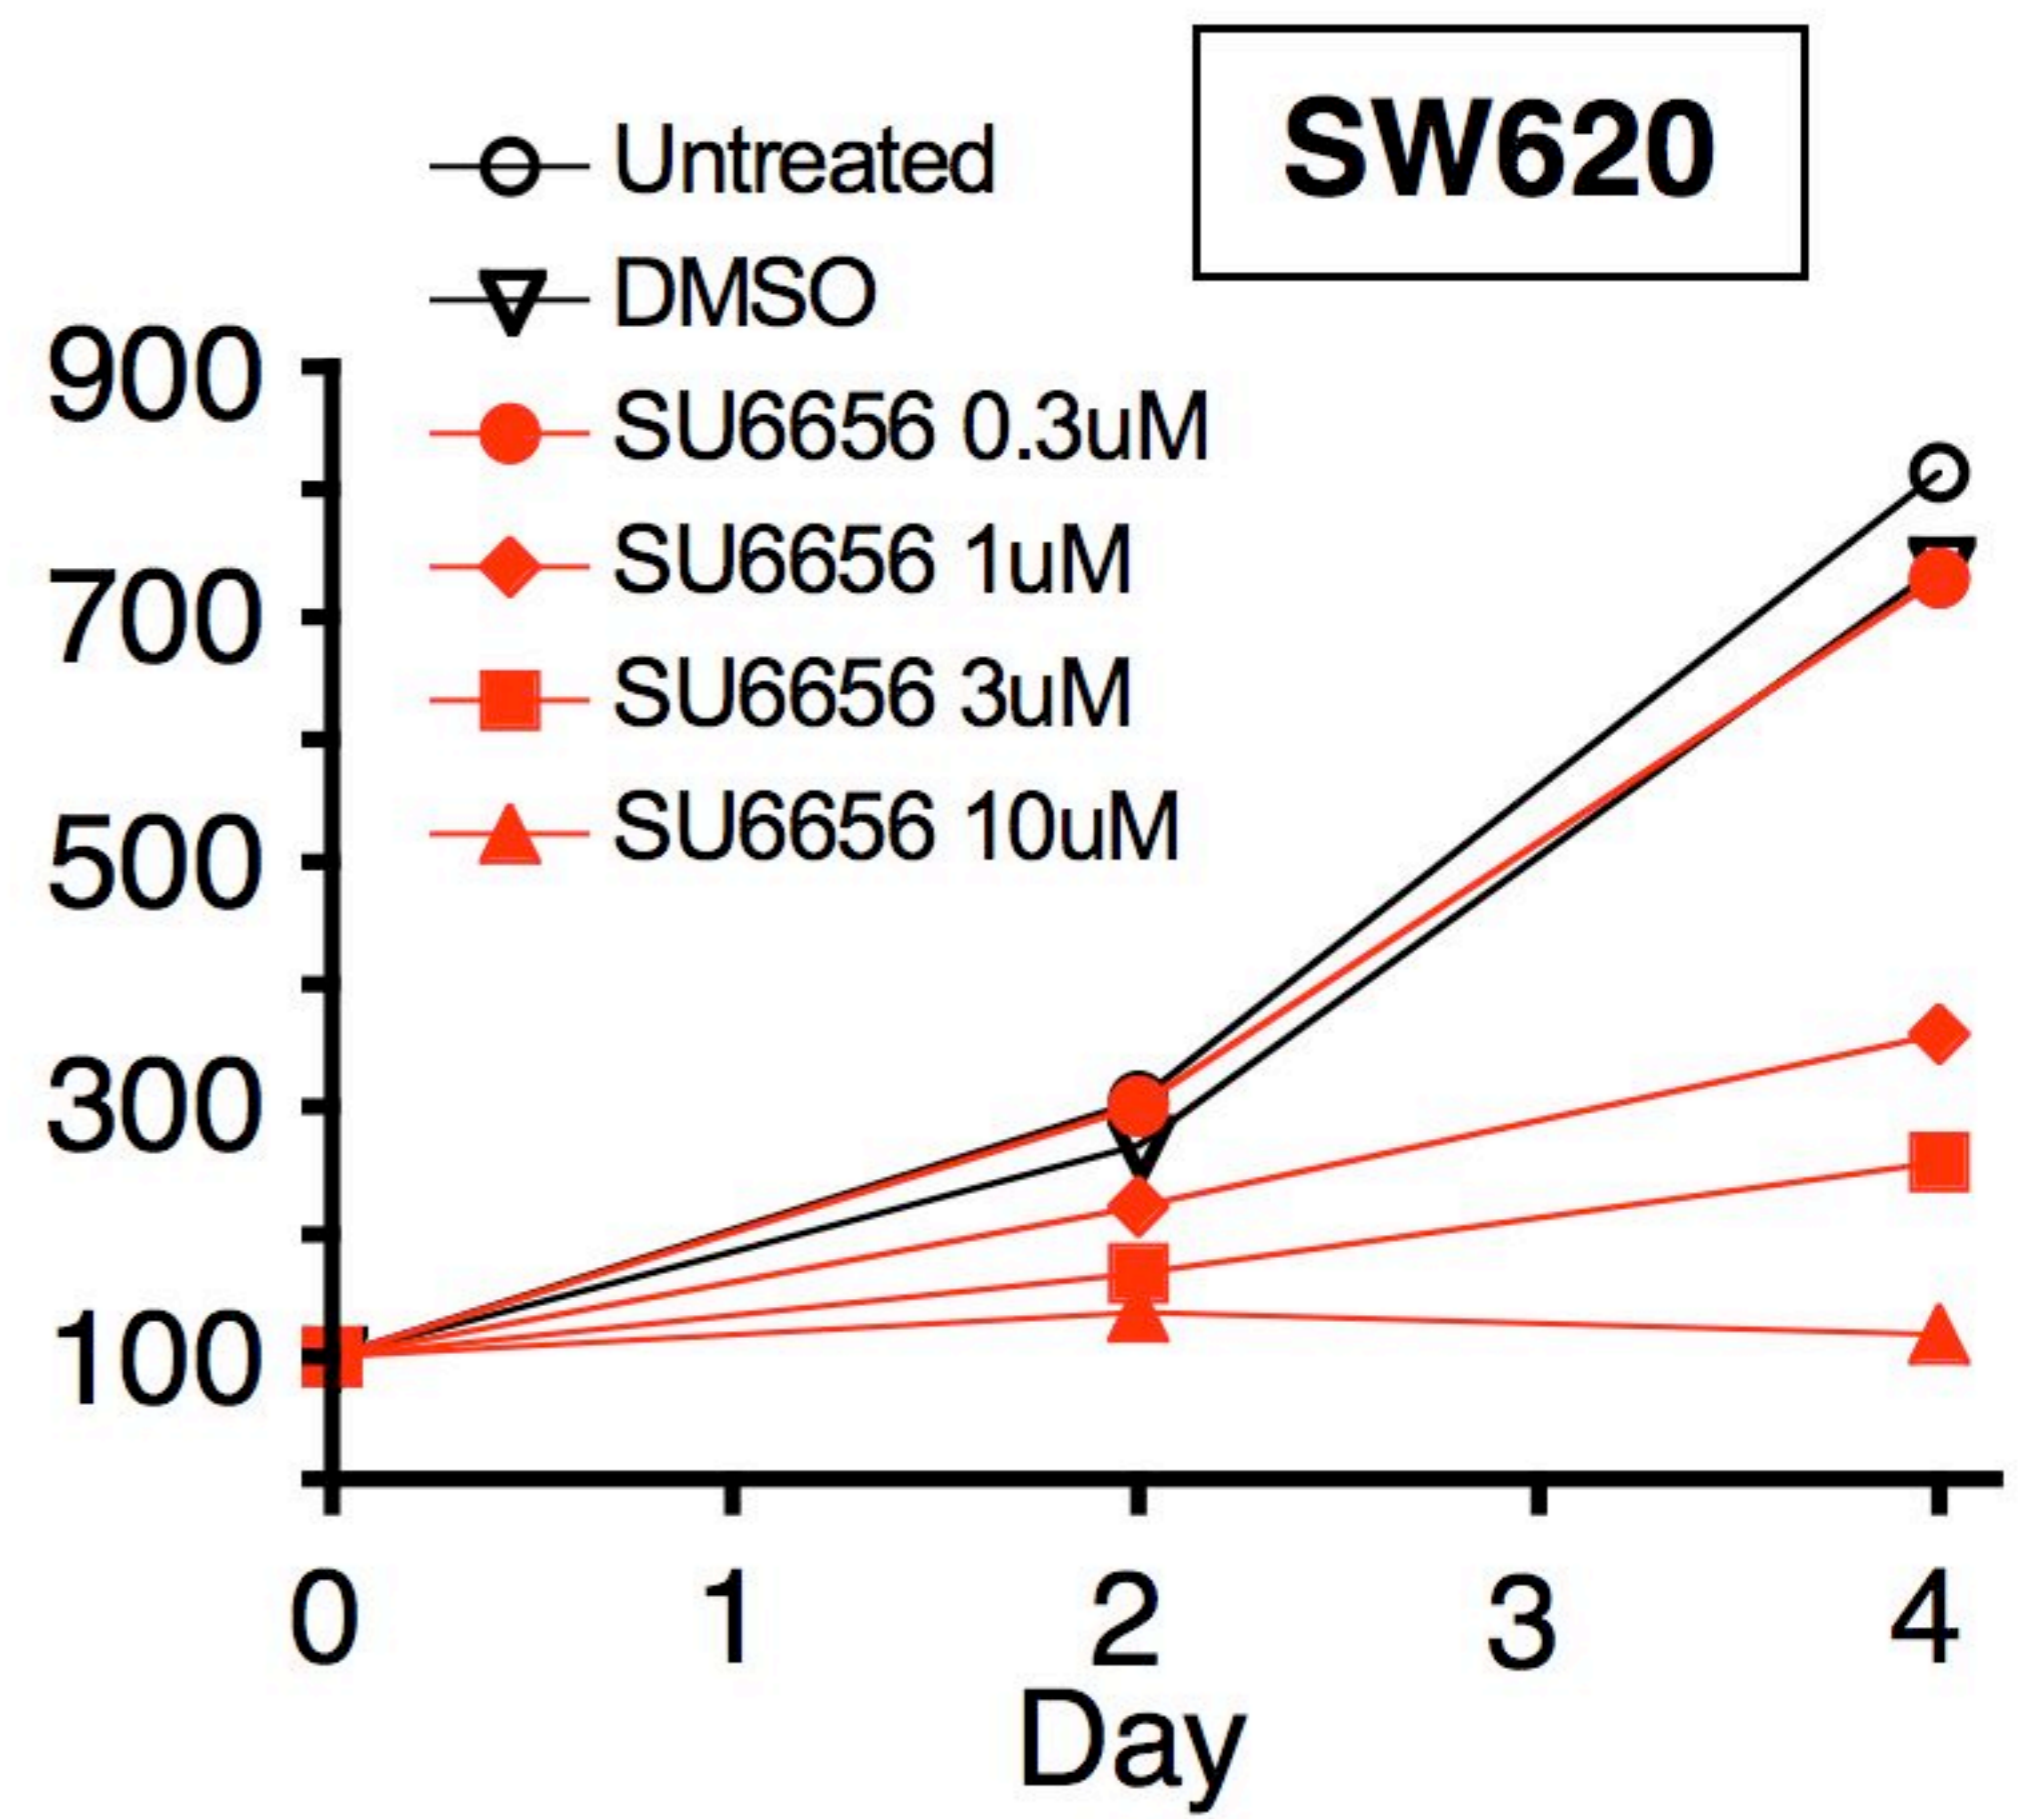

# Low pY419 Src

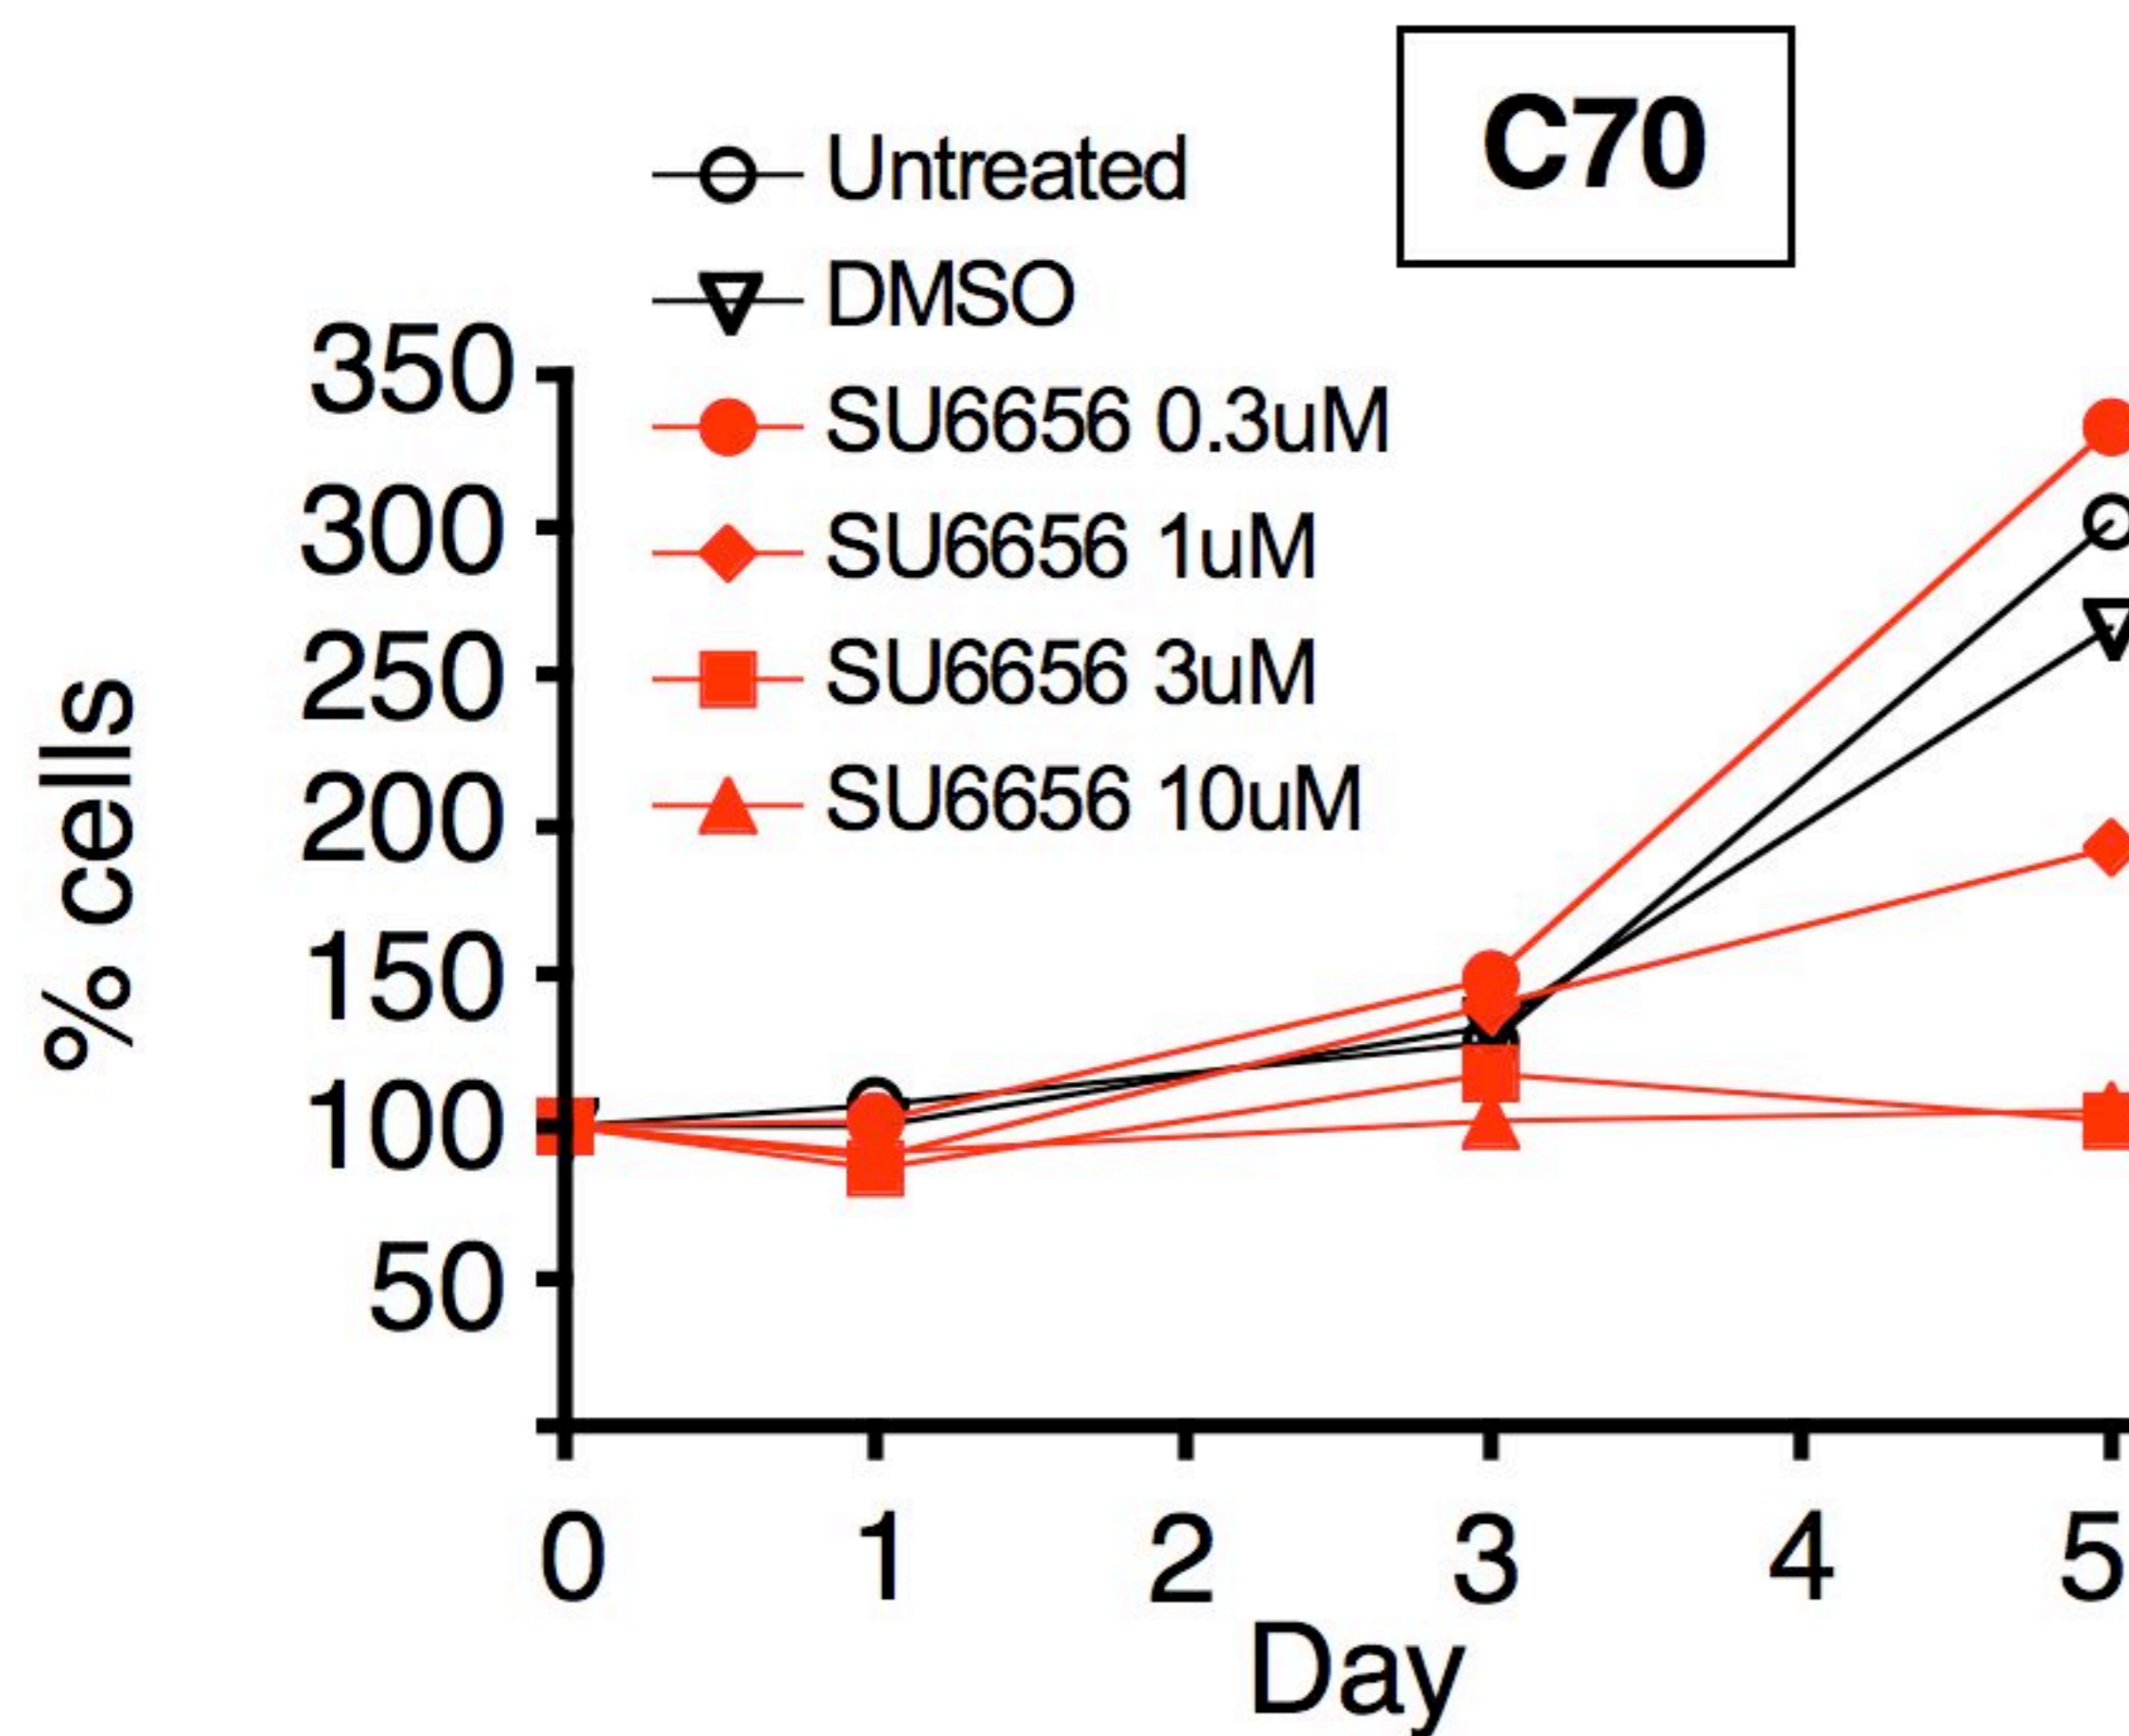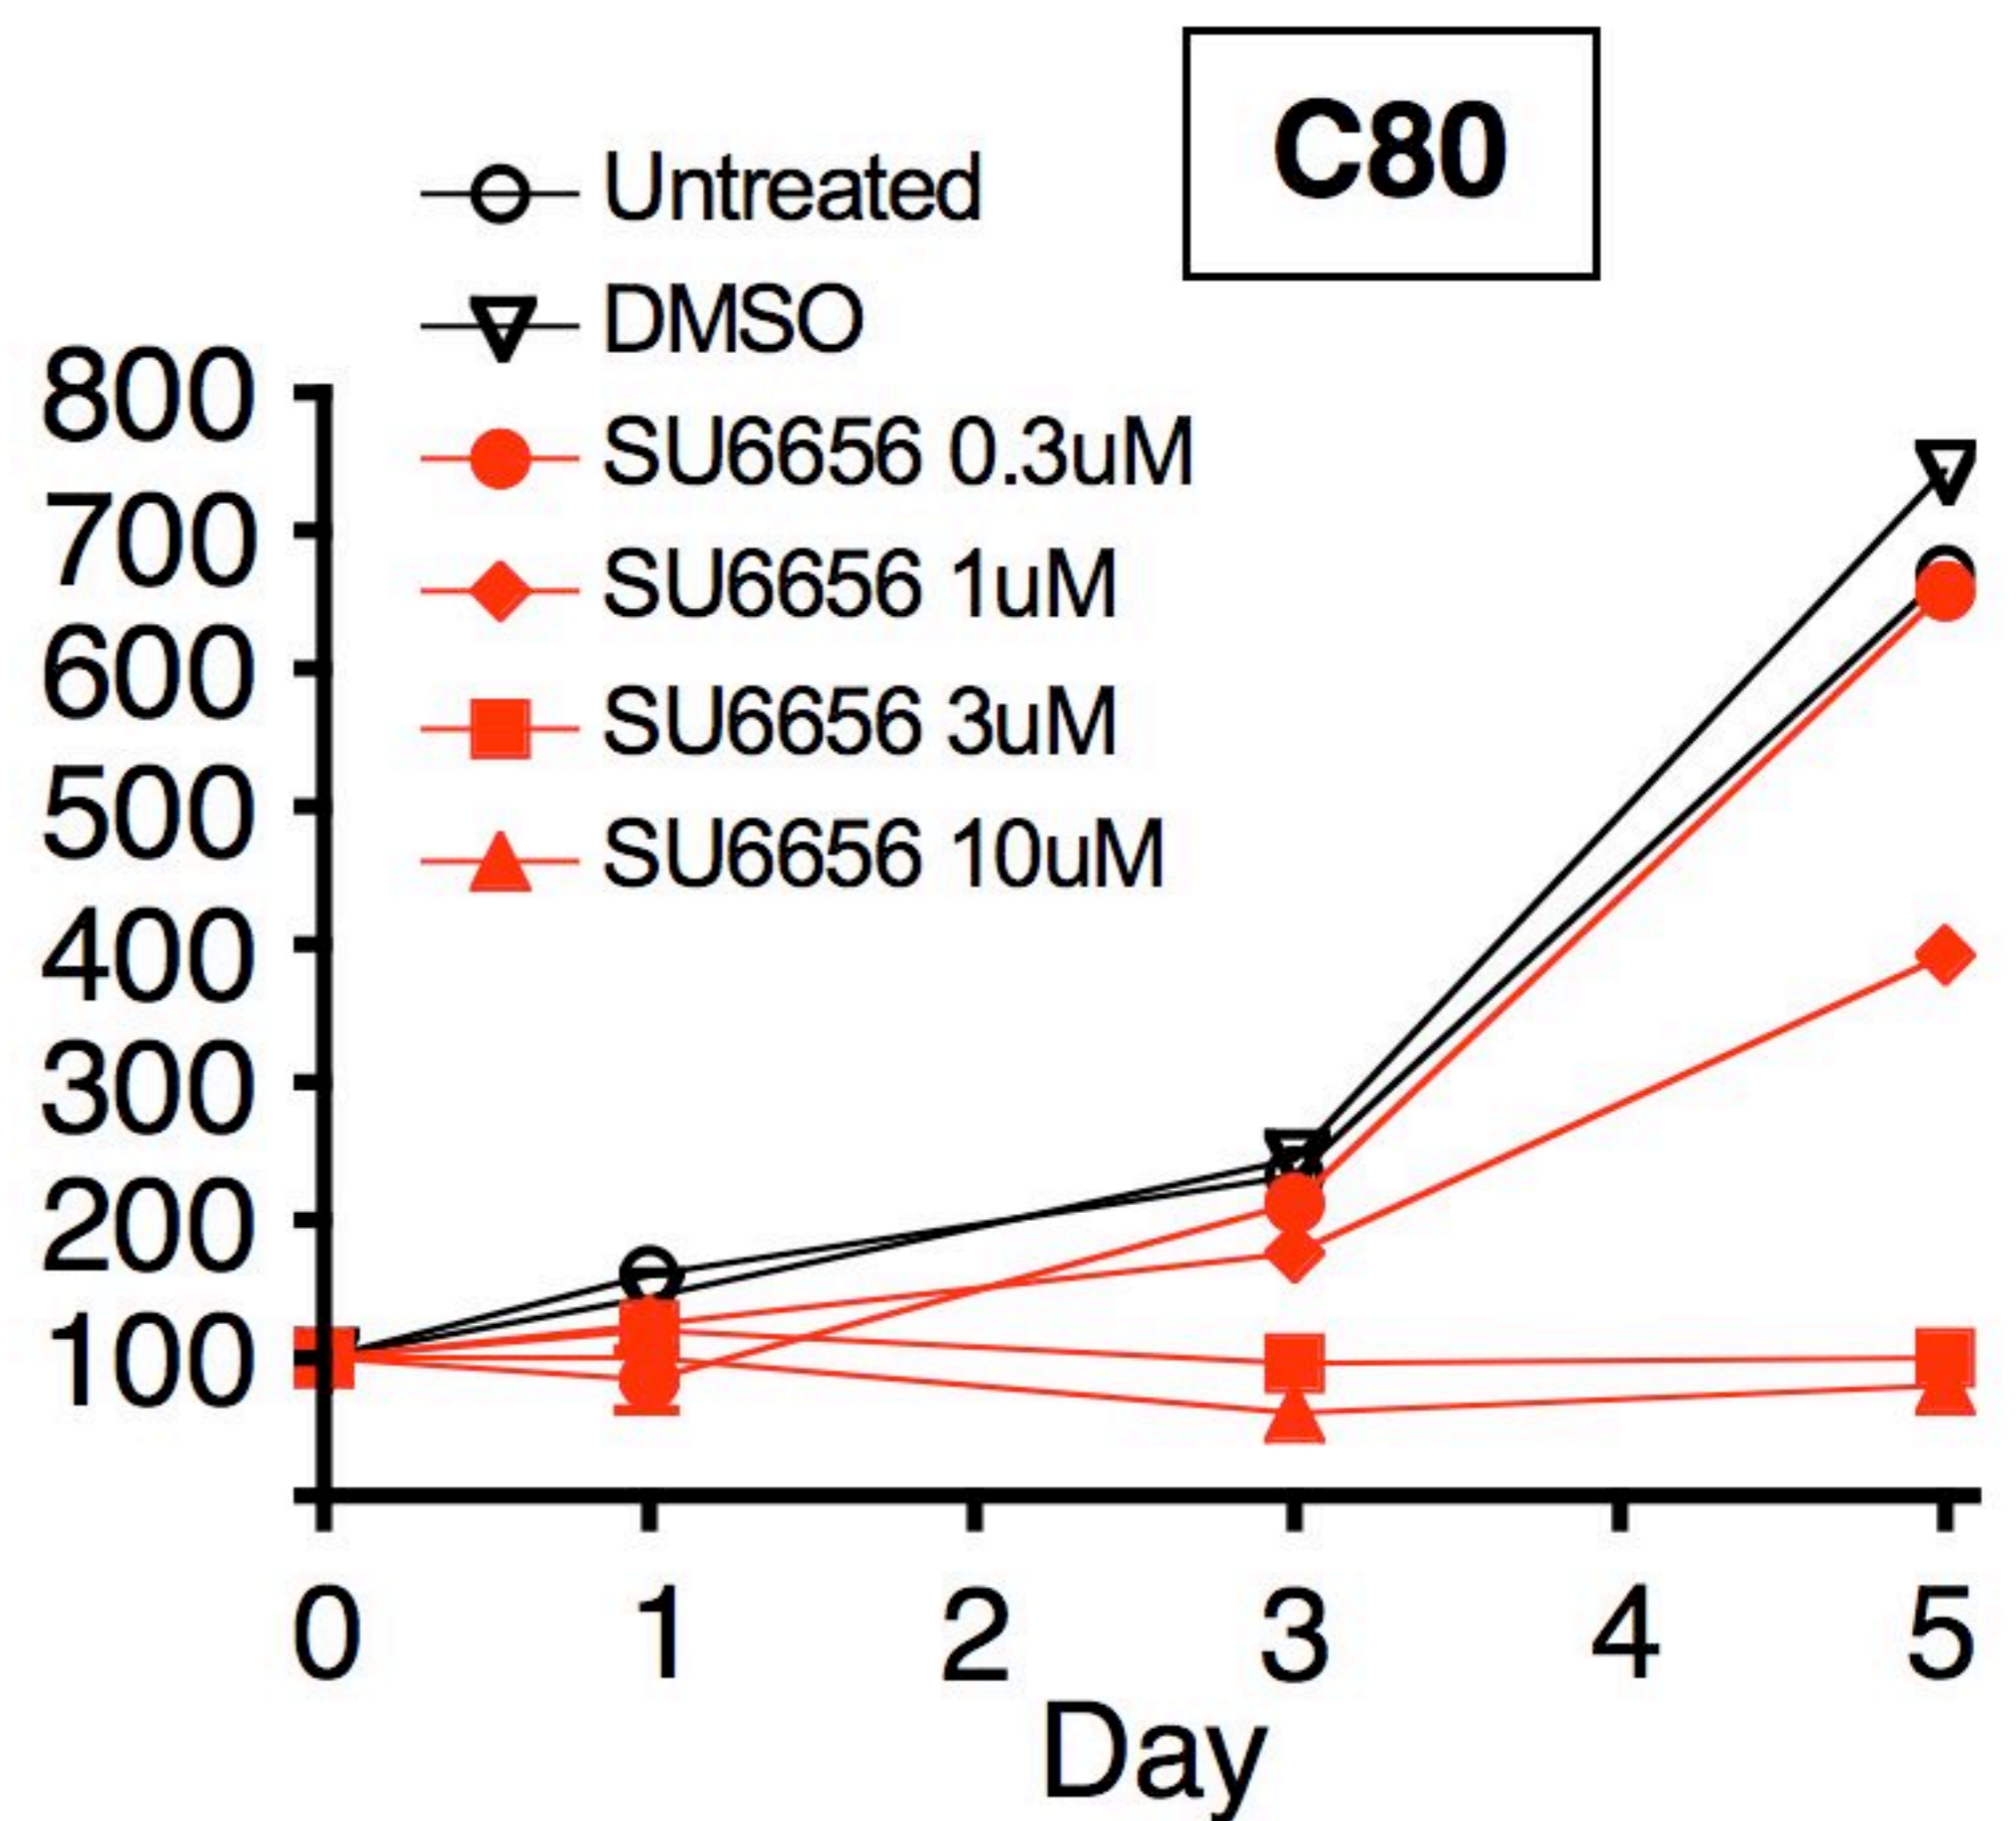

Supplement: supp_0712176105_12176Fig7.pdf [file supp_0712176105_12176Fig7.pdf]

**COLO**

**320DM**

**D**

**S**

**DLD-1**

**D**

**S**

220

97

66

45

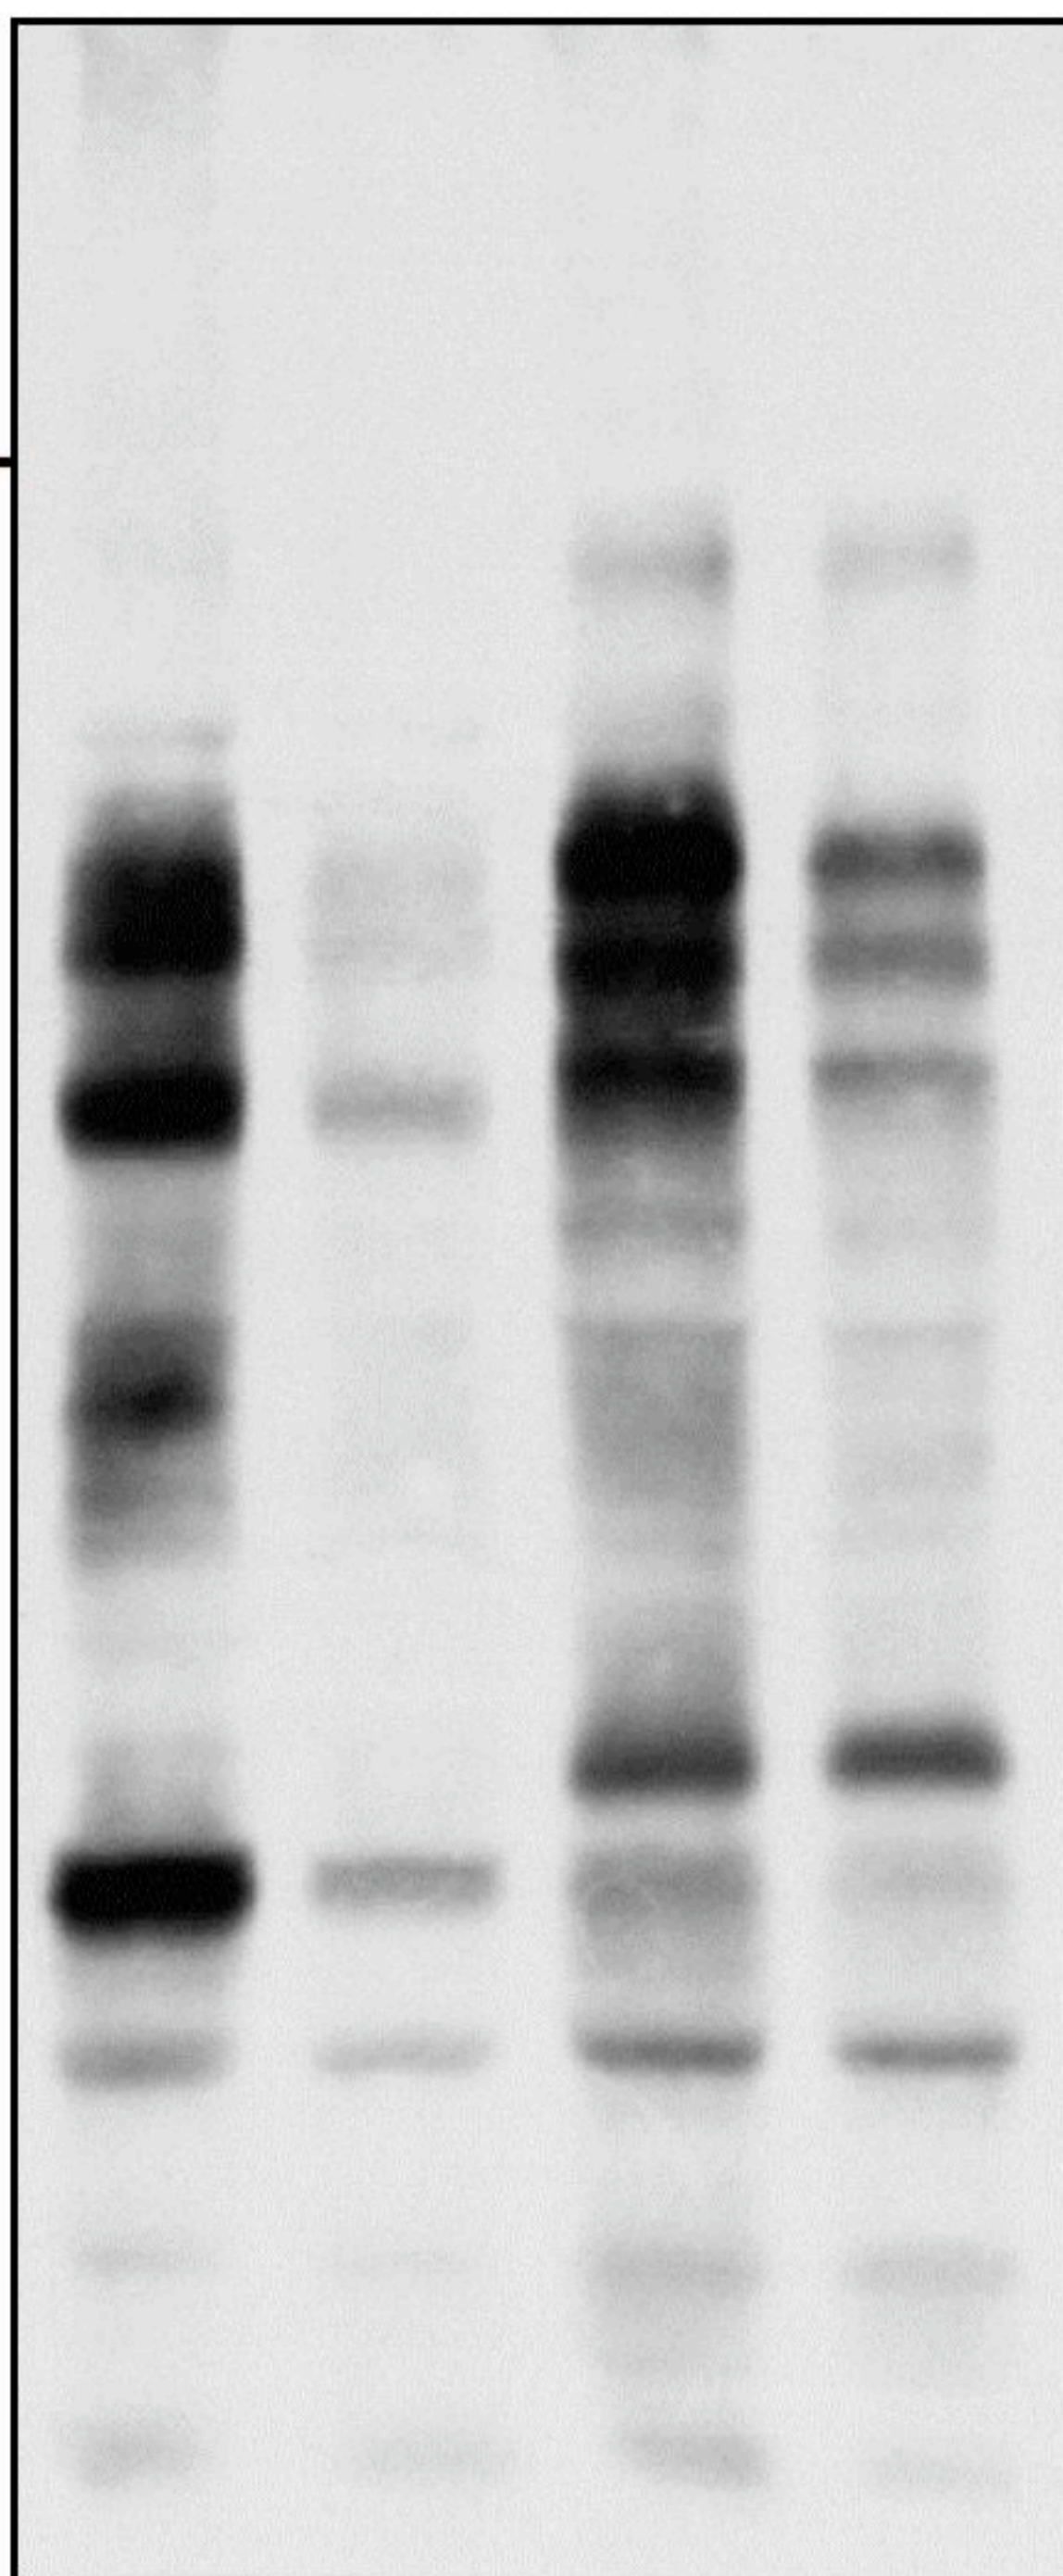

IB: pTyr (P-Tyr-100)

Supplement: supp_0712176105_12176Fig9.pdf [file supp_0712176105_12176Fig9.pdf]
